# Supplementary material for: A photo-driven traceless group directed electron–donor–acceptor (EDA) complex initiated radical coupling/dehydrogenation tandem reaction: access to 1-allyl/benzyl-3,4-dihydroisoquinoline
Source: Royal Society of Chemistry journal article supplement (doi:10.1039/d3qo02022c), 2024-01-01

## Supporting Information

### Photo-Driven Traceless Directed Electron-Donor-Acceptor (EDA)

### Complex Initiated Radical Coupling/Dehydrogenation Tandem

### Reaction: Access to 1-Allyl/Benzyl-3,4-dihydroisoquinoline

Tao Zhang,<sup>a</sup> Xinxin Ren,<sup>a</sup> Bin Wang,<sup>a</sup> Weiwei Jin,<sup>a</sup> Yu Xia,<sup>a</sup> Shaofeng Wu,<sup>a</sup> Chenjiang Liu<sup>\*a,b,c</sup> and Yonghong Zhang<sup>\*a,c</sup>

<sup>a</sup>Urumqi Key Laboratory of Green Catalysis and Synthesis Technology, Key Laboratory of Oil and Gas Fine Chemicals, Ministry of Education & Xinjiang Uygur Autonomous Region, State Key Laboratory of Chemistry and Utilization of Carbon Based Energy Resources, College of Chemistry, Xinjiang University, Urumqi 830017, P. R. China.

E-mail: pxylcj@126.com; zhzhzyh@126.com

<sup>b</sup>College of Future Technology, Xinjiang University, Urumqi 830017, P. R. China.

E-mail: pxylcj@126.com

<sup>c</sup>Institute of Materia Medica, Xinjiang University, Urumqi 830017, P. R. China.

E-mail: pxylcj@126.com; zhzhzyh@126.com

## Table of Contents

|                                                                                                        |     |
|--------------------------------------------------------------------------------------------------------|-----|
| 1. General information .....                                                                           | S1  |
| 2. Experimental procedures .....                                                                       | S2  |
| 2.1 Optimization of reaction conditions .....                                                          | S2  |
| 2.2 General procedure for the synthesis of products <b>3a-3y</b> (taking <b>3a</b> as an example)..... | S4  |
| 2.3. Large scale experiments.....                                                                      | S4  |
| 3 Mechanistic studies.....                                                                             | S5  |
| 3.1 ON/OFF experiments.....                                                                            | S5  |
| 3.2 UV–vis spectroscopic measurements .....                                                            | S5  |
| 3.3 Free radical trapping experiment .....                                                             | S6  |
| 3.4 Aryl diazo cation capture experiment.....                                                          | S6  |
| 3.5 H <sub>2</sub> detection experiments .....                                                         | S7  |
| 3.6 Br <sup>-</sup> detection experiments .....                                                        | S8  |
| 4. Analytical data .....                                                                               | S9  |
| 5. References.....                                                                                     | S16 |
| 6. Copies of NMR spectra.....                                                                          | S17 |

## 1. General information

Unless otherwise noted, all reagents and solvents were purchased from commercial sources (Adamas-beta, Energy Chemical) and used without further purification.

### NMR spectrum

$^1\text{H}$  and  $^{13}\text{C}$  NMR spectra were collected on 400 or 600 MHz NMR spectrometers (Varian Inova-400 or Bruker Avance NEO 600). Chemical shifts for protons were reported in parts per million (ppm) downfield from tetramethylsilane and were referenced to residual protium in the NMR solvents ( $\text{CDCl}_3 = \delta 7.26$ ). Chemical shifts for carbon resonances were reported in parts per million (ppm) downfield from tetramethylsilane and were referenced to the carbon resonances of the solvents ( $\text{CDCl}_3 = \delta 77.16$ ). The following abbreviations were used to describe peak splitting patterns when appropriate: s=singlet, d=doublet, t=triplet, q=quartet, sept=septet, m=multiplet, dd=doublet of doublets, dt=doublet of triplet, ddd=doublet of doublets of doublets, Coupling constants  $J$  were reported in hertz unit (Hz).

### Melting point

Melting point (M.P.) was recorded on BÜCHI (M-560).

### HRMS

High-resolution mass spectra (HRMS) were recorded on Thermo Fisher Scientific QExactive.

### Column Chromatography

Analytical thin layer chromatography (TLC) was performed on 0.20 mm silica gel 60F<sub>254</sub> plates. Column chromatography was undertaken on silica gel (300-400 mesh) using a proper eluent.

### UV light

Visualization on TLC was achieved by the use of UV light (254 nm).

## 2. Experimental procedures

### 2.1 Optimization of reaction conditions

#### 2.1.1 Table S1. Base screening<sup>a</sup>

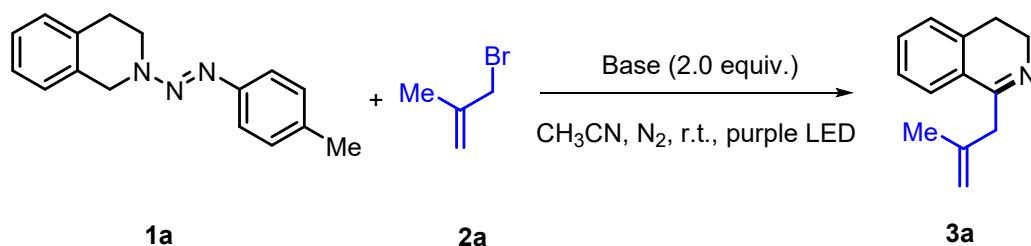

| Entry | Base                            | Yield/% <sup>b</sup> |
|-------|---------------------------------|----------------------|
| 1     | Cs <sub>2</sub> CO <sub>3</sub> | 23                   |
| 2     | K <sub>2</sub> CO <sub>3</sub>  | 20                   |
| 3     | Na <sub>2</sub> CO <sub>3</sub> | 12                   |
| 4     | KOH                             | trace                |
| 5     | NaOAc                           | trace                |
| 6     | NaHCO <sub>3</sub>              | trace                |
| 7     | DBU                             | trace                |
| 8     | DABCO                           | trace                |
| 9     | Et <sub>3</sub> N               | trace                |

<sup>a</sup>Reaction Conditions: **1a** (0.2 mmol), **2a** (0.4 mmol), Base (2.0 equiv.), CH<sub>3</sub>CN (2 mL), rt, 24 h, N<sub>2</sub>, 10 W purple LED. <sup>b</sup>Yields of isolated products are reported.

#### 2.1.2 Table S2. Solvent screening<sup>a</sup>

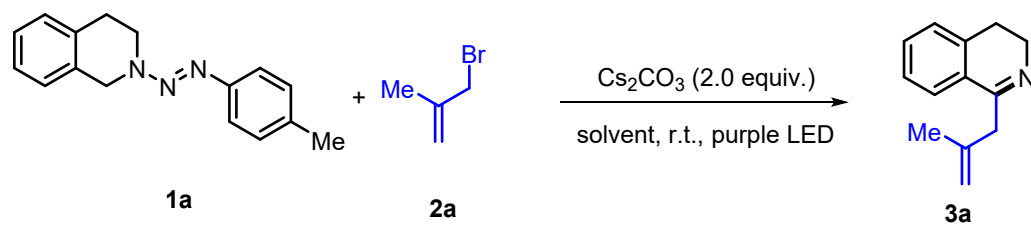

| Entry     | Solvent                 | Yield/% <sup>b</sup> |
|-----------|-------------------------|----------------------|
| 1         | DCM                     | N.D                  |
| 2         | 1,4-Dioxane             | trace                |
| 3         | NMP                     | trace                |
| 4         | EtOAc                   | trace                |
| 5         | EtOH                    | trace                |
| 6         | Toluene                 | trace                |
| 7         | THF                     | trace                |
| 8         | DMSO                    | trace                |
| 9         | DMA                     | 20                   |
| 10        | DMF                     | 21                   |
| <b>11</b> | <b>CH<sub>3</sub>CN</b> | <b>23</b>            |

<sup>a</sup>Reaction Conditions: **1a** (0.2 mmol), **2a** (0.4 mmol), Cs<sub>2</sub>CO<sub>3</sub> (2.0 equiv.), Solvent (2 mL), rt, 24 h, N<sub>2</sub>, 10 W purple LED. <sup>b</sup>Yields of isolated products are reported.

### 2.1.3 Table S3. Screening of the amount of base<sup>a</sup>

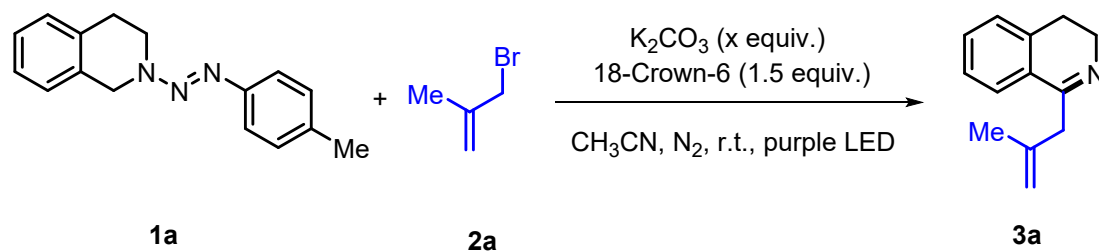

| Entry    | Base                                           | Solvent                 | Yield/% <sup>b</sup> |
|----------|------------------------------------------------|-------------------------|----------------------|
| 1        | K <sub>2</sub> CO <sub>3</sub> (1.5 equiv.)    | CH <sub>3</sub> CN      | 45                   |
| 2        | K <sub>2</sub> CO <sub>3</sub> (2.0 equiv.)    | CH <sub>3</sub> CN      | 50                   |
| 3        | K <sub>2</sub> CO <sub>3</sub> (2.25 equiv.)   | CH <sub>3</sub> CN      | 41                   |
| <b>4</b> | <b>K<sub>2</sub>CO<sub>3</sub>(2.5 equiv.)</b> | <b>CH<sub>3</sub>CN</b> | <b>63</b>            |
| 5        | K <sub>2</sub> CO <sub>3</sub> (2.75 equiv.)   | CH <sub>3</sub> CN      | 56                   |
| 6        | K <sub>2</sub> CO <sub>3</sub> (3.0 equiv.)    | CH <sub>3</sub> CN      | 45                   |

<sup>a</sup>Reaction Conditions: **1a** (0.2 mmol), **2a** (0.4 mmol), K<sub>2</sub>CO<sub>3</sub> (x equiv.), 18-crown-6 (1.5 equiv.), CH<sub>3</sub>CN (2 mL), rt, 36 h, N<sub>2</sub>, 10 W purple LED. <sup>b</sup>Yields of isolated products are reported.

## 2.2 General procedure for the synthesis of products 3a-3y (taking 3a as an example)

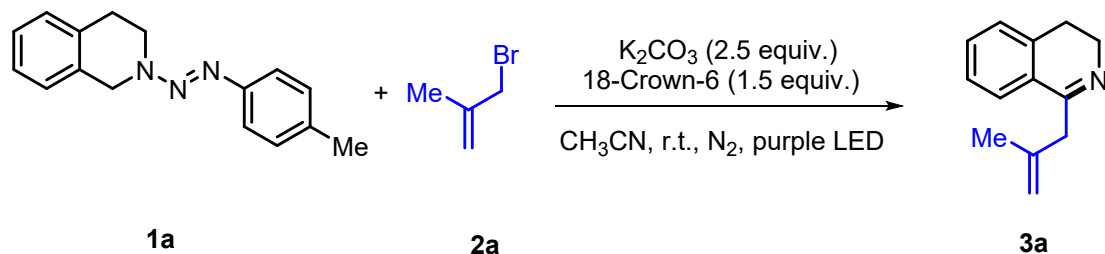

(*E*)-2-(*p*-toluenediazenyl)-1,2,3,4-tetrahydroisoquinoline **1a** (0.20 mmol, 1.0 equiv.), 3-bromomethylpropene **2a** (0.4 mmol, 2.0 equiv.),  $\text{K}_2\text{CO}_3$  (0.5 mmol, 2.5 equiv.) and 18-crown-6 (0.3 mmol, 1.5 equiv.),  $\text{CH}_3\text{CN}$  (2 mL), under  $\text{N}_2$  atmosphere (1 atm) irradiated with 10 W purple LED (395 nm) at room temperature. The reaction was carried out for 36 h. After the reaction is completed, the reaction mixture was filtered to remove inorganic salts, and wash with ethyl acetate three times. The filtrate was concentrated *in vacuo*, and the residue was purified by silica gel column chromatography eluting with a mixed solvent of petroleum ether and ethyl acetate (15:1-5:1, v/v) to afford the pure product **3a** with a yield of 63%.

## 2.3 Large-scale experiments

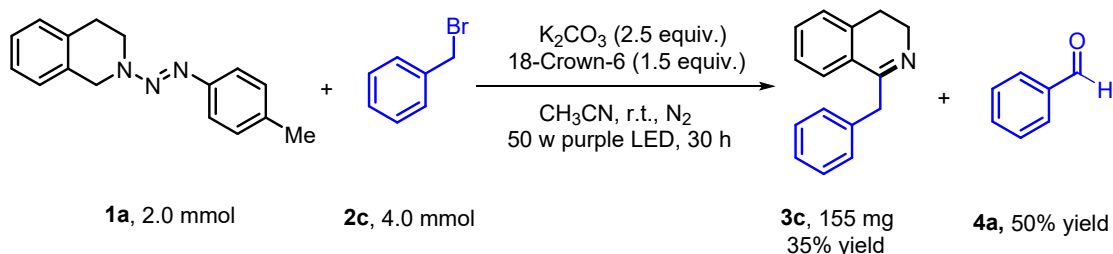

(*E*)-2-(*p*-toluenediazenyl)-1,2,3,4-tetrahydroisoquinoline **1a** (2.0 mmol, 1.0 equiv.), benzyl bromide **2c** (4.0 mmol, 2.0 equiv.),  $\text{K}_2\text{CO}_3$  (5 mmol, 2.5 equiv.) and 18-crown-6 (3 mmol, 1.5 equiv.),  $\text{CH}_3\text{CN}$  (10 mL), under  $\text{N}_2$  atmosphere (1 atm) irradiated with 50 W purple LED (395 nm) at room temperature. The reaction was carried out for 30 h. After the reaction is completed, the reaction mixture was filtered to remove inorganic salts, and wash with ethyl acetate three times. The filtrate was concentrated *in vacuo*, and the residue was purified by silica gel column chromatography eluting with a mixed solvent of petroleum ether and ethyl acetate (15:1-5:1, v/v) to afford the pure product **3c** and **4a** with yields of 35% and 50%, respectively. The pure product **4a** was consistent with previous reports<sup>1-3</sup>.

### 3 Mechanistic studies

#### 3.1 ON/OFF experiments

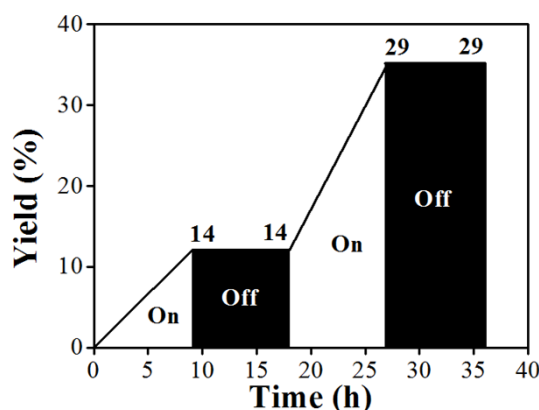

**Figure S1. "ON/OFF" experiment**

In order to further prove the effect of visible light irradiation, the "on/off" experiment by using model reaction was carried out. Under standard conditions, the reaction time is 9 h when the lamp is turned on and 9 h when the lamp is turned off. Loop twice. The results show that light plays an important role in the reaction system (Figure S1).

#### 3.2 UV-vis spectroscopic measurements

The UV/vis absorption spectra of (*E*)-2-(*p*-toluenediazenyl)-1,2,3,4-tetrahydroisoquinoline **1a** (0.02 M), 3-bromomethylpropene **2a** (0.04 M) in CH<sub>3</sub>CN were recorded in 1 cm path quartz cuvettes by using a Thermo Nanodrop 2000c UV/Vis spectrophotometer, respectively (Figure S2-1).

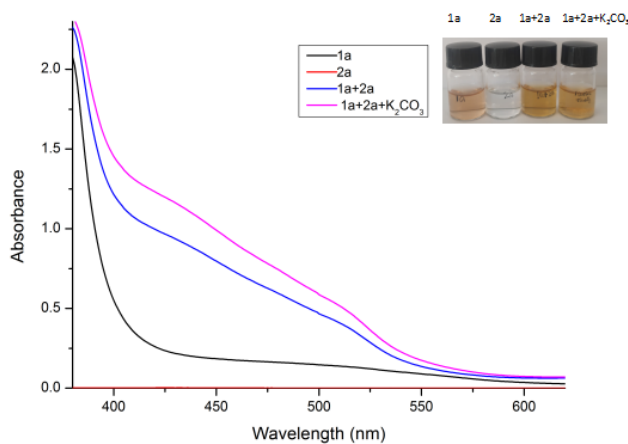

**Figure S2-1. UV-vis spectroscopic measurements**

Similarly, Figure S2-2 shows the light irradiation study for the mixture of **1a** and K<sub>2</sub>CO<sub>3</sub> in CH<sub>3</sub>CN. Thereafter, the quartz cuvette was kept under irradiation of 10 W

purple LEDs for 5 minutes and the absorption spectra were recorded immediately. This process was repeated for obtaining the absorption spectra after consecutive 5 min cycles of irradiation with the light source. As shown in Figure S2-2, although  $K_2CO_3$  does not show significant UV-vis absorption alone in the visible light region, when **1a** and its mixture are not irradiation, UV-vis absorption occurs; And after irradiation, it shows a redshift. This indicates the possibility of interaction between carbonate and **1a**, leading to photoinduced cross-species SET<sup>4</sup>.

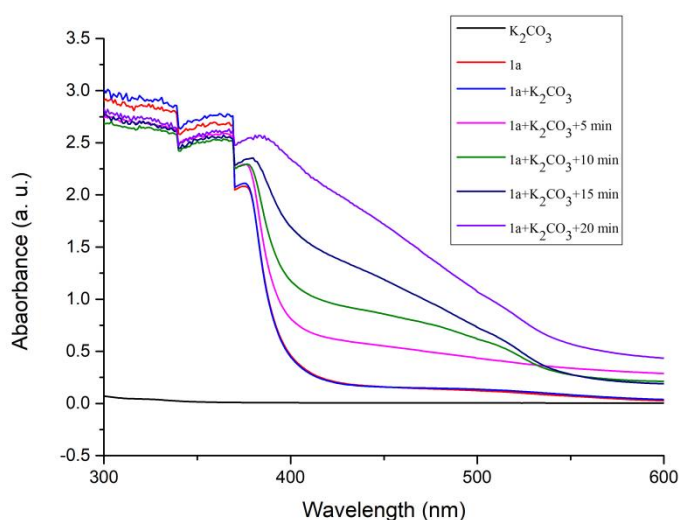

Figure S2-2. UV-vis spectroscopic measurements

### 3.3 Free radical trapping experiment

(*E*)-2-(*p*-toluenediazenyl)-1,2,3,4-tetrahydroisoquinoline **1a** (0.20 mmol, 1.0 equiv.), 3-bromomethylpropene **2a** (0.4 mmol, 2.0 equiv.),  $K_2CO_3$  (0.5 mmol, 2.5 equiv.) and 18-crown-6 (0.3 mmol, 1.5 equiv.), TEMPO (0.6 mmol, 3.0 equiv.) or BHT(0.8 mmol, 4.0 equiv.),  $CH_3CN$  (2 mL), under  $N_2$  atmosphere (1 atm) irradiated with 10 W purple LED (395 nm) at room temperature. The reaction was carried out for 36 h. The intermediates **5a** and **6a** were captured by free radical trapping agents and detected by high-resolution mass spectrometry (Figure S3).

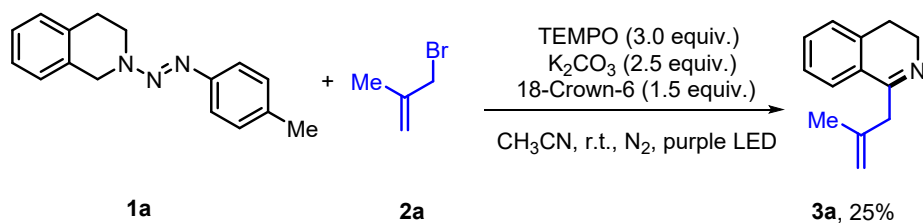



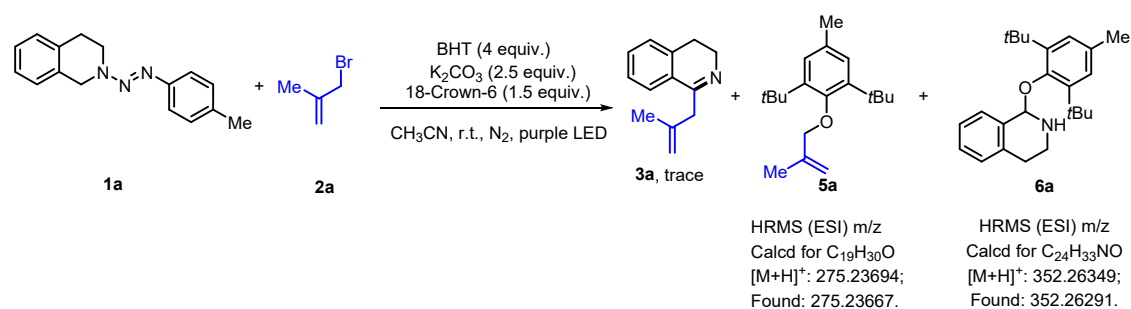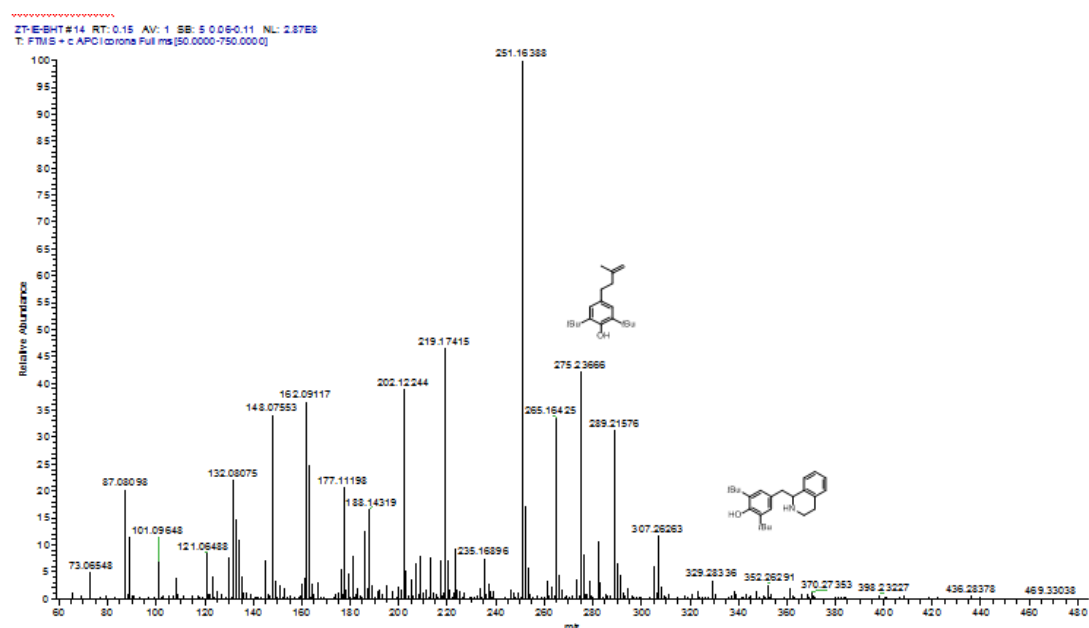

Figure S3. Free radical trapping experiment

### 3.4 Aryl diazo cation capture experiment

*(E)*-2-(*p*-toluenediazenyl)-1,2,3,4-tetrahydroisoquinoline **1a** (0.20 mmol, 1.0 equiv.), 3-bromomethylpropene **2a** (0.4 mmol, 2.0 equiv.),  $\beta$ -naphthol (0.20 mmol, 1.0 equiv.), K<sub>2</sub>CO<sub>3</sub> (0.5 mmol, 2.5 equiv.) and 18-crown-6 (0.3 mmol, 1.5 equiv.), CH<sub>3</sub>CN (2 mL), under N<sub>2</sub> atmosphere (1 atm) irradiated with 10 W purple LED (395 nm) at room temperature. The reaction was carried out for 36 h. The desired product **3a** was obtained in 45% isolated yield and the captured diazo cation sideproduct (*E*)-1-(*p*-tolylidiazonyl)naphthalen-2-ol (**7a**)<sup>5</sup> was afforded in 52% isolated yield, and demonstrated through high-resolution mass spectrometry. In addition, in order to further prove that the diazo aryl group originates from the self-decomposition of **1a**, we only added **1a** and naphthol to the reaction system. In the end, we obtained the product of diazotization with a yield of 15%. Based on the above experiments, we believe that naphthol can be chosen as the capture agent for diazo aryl groups (Figure S4).

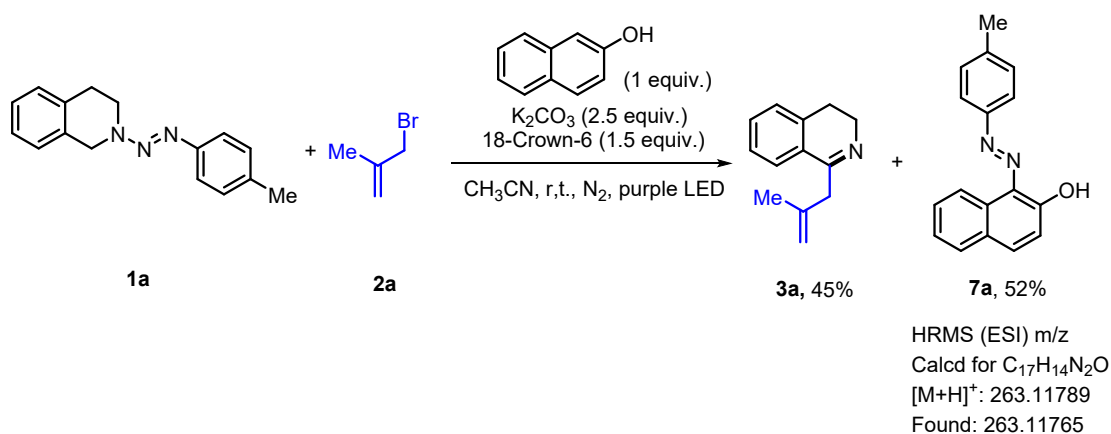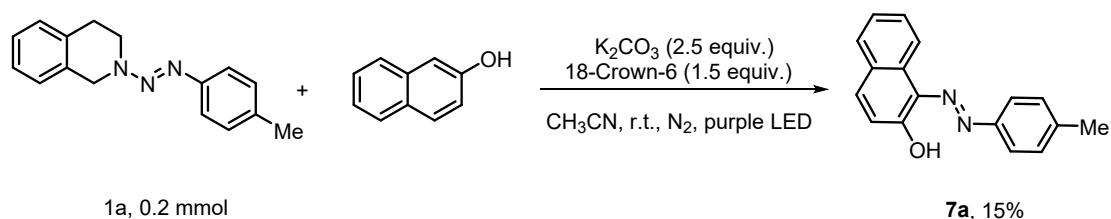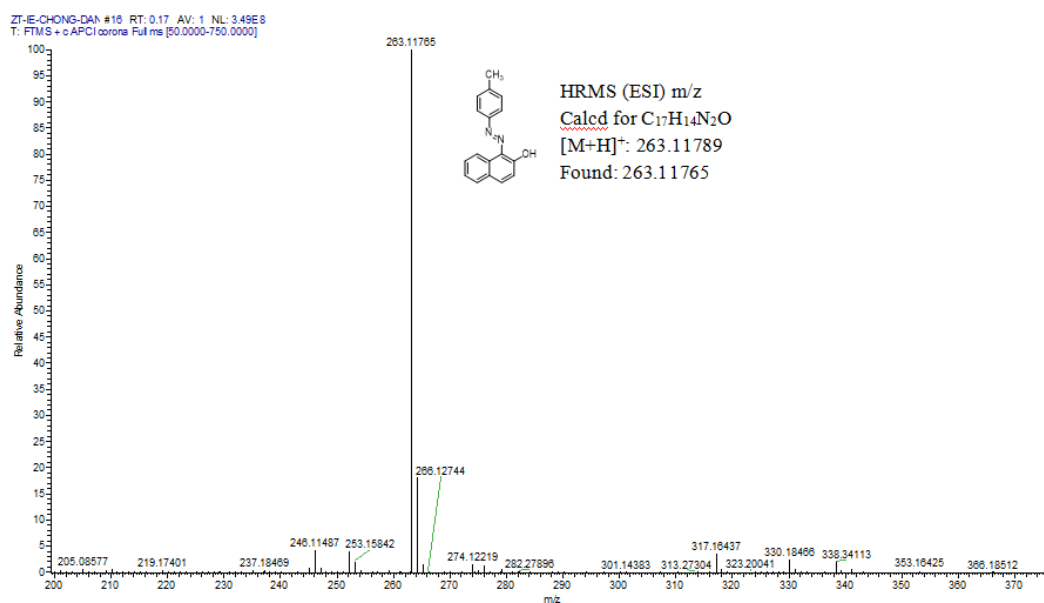

Figure S4. Aryl diazo cation capture experiment

### 3.5 H<sub>2</sub> detection experiments

In order to demonstrate the release of H<sub>2</sub> during this photochemical procedure, the model reaction of (*E*)-2-(*p*-toluenediazenyl)-1,2,3,4-tetrahydroisoquinoline **1a** (0.20 mmol, 1.0 equiv.), 3-bromomethylpropene **2a** (0.4 mmol, 2.0 equiv.), K<sub>2</sub>CO<sub>3</sub> (0.5 mmol, 2.5 equiv.) and 18-crown-6 (0.3 mmol, 1.5 equiv.) was monitored by a H<sub>2</sub> detector under standard conditions. Just as shown in Figure S5, as the reaction proceeded, the H<sub>2</sub> was observed clearly and the concentration increased gradually.

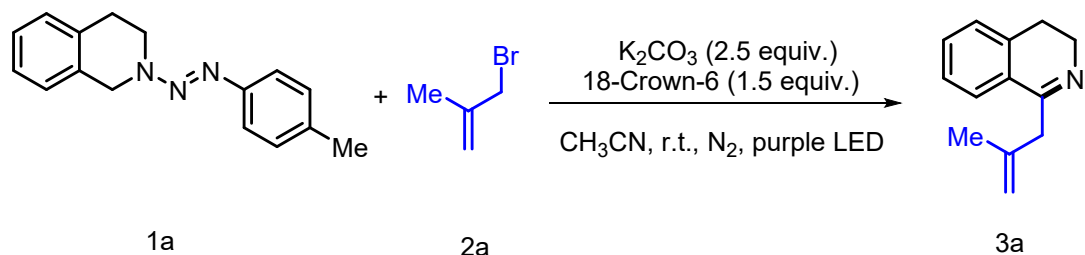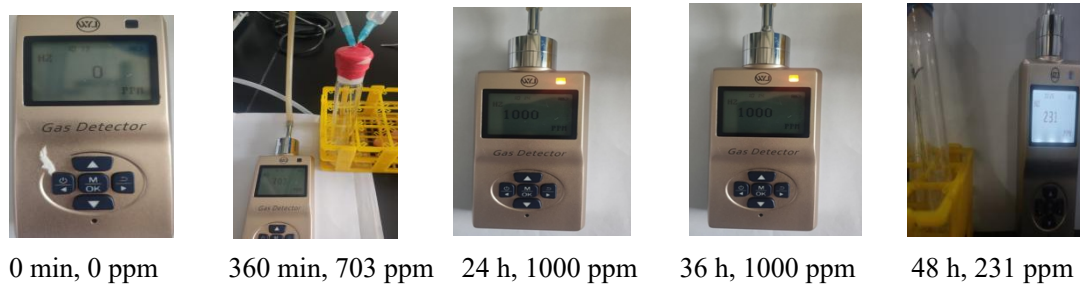

Figure S5. H<sub>2</sub> detection experiments

### 3.6 Br<sup>-</sup> detection experiments

In order to demonstrate the generation of Br<sup>-</sup> during the photocatalytic process, under standard conditions, after the reaction is completed, an aqueous solution of silver nitrate is added, and a light yellow sediment is observed, indicating the presence of Br<sup>-</sup> (Figure S6).

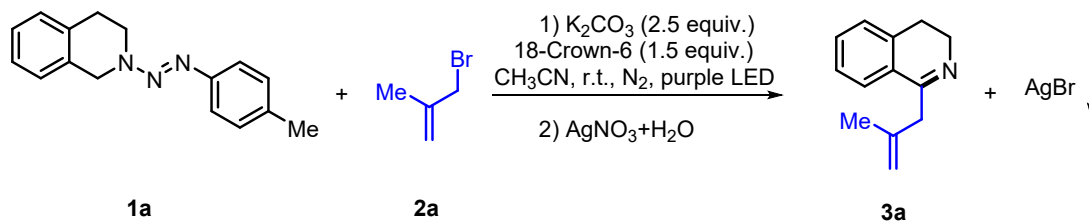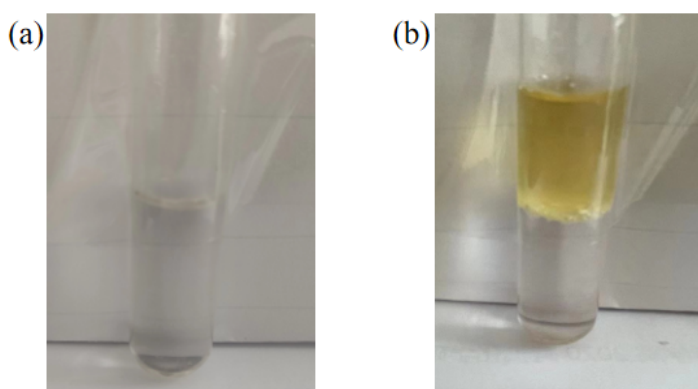

Figure S6. (a) Reaction mixture before the addition of Ag(I) solution; (b) Reaction mixture after the addition of Ag(I) solution.

## 4. Analytical data

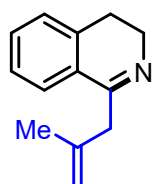

**1-(2-methylallyl)-3,4-dihydroisoquinoline (3a):** New compound, a yellow oil (23.3 mg, yield: 63%),  $^1\text{H NMR}$  (600 MHz,  $\text{CDCl}_3$ )  $\delta$  8.11 (dd,  $J = 7.7, 1.0$  Hz, 1H), 7.42 (td,  $J = 7.5, 1.4$  Hz, 1H), 7.34 (t,  $J = 7.5$  Hz, 1H), 7.18 (d,  $J = 7.5$  Hz, 1H), 4.93 (s, 1H), 4.90 (s, 1H), 4.16 (s, 2H), 3.48 (t,  $J = 6.6$  Hz, 2H), 2.98 (t,  $J = 6.6$  Hz, 2H), 1.75 (s, 3H) ppm.  $^{13}\text{C NMR}$  (150 MHz,  $\text{CDCl}_3$ )  $\delta$  164.52, 141.12, 138.22, 131.75, 129.61, 128.58, 127.18, 127.00, 112.83, 52.73, 45.14, 28.26, 20.20 ppm. **HRMS (ESI) m/z** Calcd for  $\text{C}_{13}\text{H}_{15}\text{N}$   $[\text{M}+\text{H}]^+$ : 186.12773; Found: 186.12746.

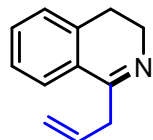

**1-allyl-3,4-dihydroisoquinoline (3b):** New compound, a yellow oil (14.4 mg, yield: 42%),  $^1\text{H NMR}$  (600 MHz,  $\text{CDCl}_3$ )  $\delta$  8.09 (dd,  $J = 7.7, 0.9$  Hz, 1H), 7.41 (td,  $J = 7.4, 1.4$  Hz, 1H), 7.34 (t,  $J = 7.5$  Hz, 1H), 7.17 (d,  $J = 7.4$  Hz, 1H), 5.86 (ddt,  $J = 16.1, 10.2, 5.9$  Hz, 1H), 5.27-5.23 (m, 1H), 5.23-5.20 (m, 1H), 4.21 (t,  $J = 1.4$  Hz, 1H), 4.20 (t,  $J = 1.4$  Hz, 1H), 3.52 (t,  $J = 6.6$  Hz, 2H), 2.99 (t,  $J = 6.6$  Hz, 2H) ppm.  $^{13}\text{C NMR}$  (150 MHz,  $\text{CDCl}_3$ )  $\delta$  164.40, 138.21, 133.30, 131.76, 129.58, 128.49, 127.17, 127.01, 117.58, 49.74, 45.46, 28.23 ppm. **HRMS (ESI) m/z** Calcd for  $\text{C}_{12}\text{H}_{13}\text{N}$   $[\text{M}+\text{H}]^+$ : 172.11208; Found: 172.11187.

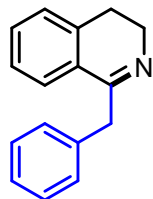

**1-benzyl-3,4-dihydroisoquinoline (3c)**<sup>6</sup>: Known compound, a yellow oil (24.3 mg, yield: 55%),  $^1\text{H NMR}$  (400 MHz,  $\text{CDCl}_3$ )  $\delta$  8.16 (d,  $J = 7.4$  Hz, 1H), 7.44-7.41 (m, 1H), 7.30-7.28 (m, 6H), 7.16 (d,  $J = 7.1$  Hz, 1H), 4.80 (s, 2H), 3.49 (t,  $J = 6.4$  Hz, 2H), 2.94 (t,  $J = 6.4$  Hz, 2H) ppm.  $^{13}\text{C NMR}$  (100 MHz,  $\text{CDCl}_3$ )  $\delta$  164.69, 138.17, 137.57, 131.81, 129.50, 129.50, 128.75, 128.57, 128.17, 127.56, 127.18, 127.02, 50.56, 45.47, 28.21 ppm. **HRMS (ESI) m/z** Calcd for  $\text{C}_{16}\text{H}_{15}\text{N}$   $[\text{M}+\text{H}]^+$ : 222.12773; Found: 222.12685.

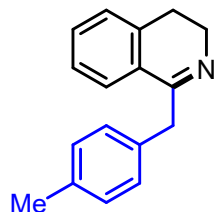

**1-(4-methylbenzyl)-3,4-dihydroisoquinoline (3d):** New compound, a yellow oil (25.4 mg, yield: 54%),  $^1\text{H NMR}$  (600 MHz,  $\text{CDCl}_3$ )  $\delta$  8.15 (dd,  $J = 7.7, 1.1$  Hz, 1H), 7.41 (td,  $J = 7.4, 1.4$  Hz, 1H),

7.36 (t,  $J = 7.3$  Hz, 1H), 7.23 (d,  $J = 7.9$  Hz, 2H), 7.14 (t,  $J = 8.8$  Hz, 3H), 4.76 (s, 2H), 3.47 (t,  $J = 6.6$  Hz, 2H), 2.92 (t,  $J = 6.6$  Hz, 2H), 2.33 (s, 3H) ppm.  $^{13}\text{C}$  NMR (150 MHz,  $\text{CDCl}_3$ )  $\delta$  164.67, 138.20, 137.26, 134.55, 131.78, 129.61, 129.45, 128.60, 128.23, 127.19, 127.01, 50.28, 45.35, 28.25, 21.25 ppm. HRMS (ESI)  $m/z$  Calcd for  $\text{C}_{17}\text{H}_{11}\text{N}$   $[\text{M}+\text{H}]^+$ : 236.14338; Found: 236.14314.

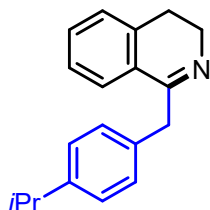

**1-(4-isopropylbenzyl)-3,4-dihydroisoquinoline (3e):** New compound, a yellow oil (22.1 mg, yield: 42%),  $^1\text{H}$  NMR (600 MHz,  $\text{CDCl}_3$ )  $\delta$  8.15 (dd,  $J = 7.7, 1.0$  Hz, 1H), 7.41 (td,  $J = 7.4, 1.4$  Hz, 1H), 7.35 (t,  $J = 7.3$  Hz, 1H), 7.26 (d,  $J = 8.1$  Hz, 2H), 7.19 (d,  $J = 8.1$  Hz, 2H), 7.16 (d,  $J = 7.4$  Hz, 1H), 4.77 (s, 2H), 3.49 (t,  $J = 6.7$  Hz, 2H), 2.94 (t,  $J = 6.7$  Hz, 2H), 2.89 (sept,  $J = 6.9$  Hz, 1H), 1.24 (d,  $J = 6.9$  Hz, 6H) ppm.  $^{13}\text{C}$  NMR (150 MHz,  $\text{CDCl}_3$ )  $\delta$  164.67, 148.25, 138.21, 134.89, 131.77, 129.62, 128.60, 128.21, 127.18, 127.01, 126.81, 50.35, 45.48, 33.93, 28.26, 24.13 ppm. HRMS (ESI)  $m/z$  Calcd for  $\text{C}_{19}\text{H}_{21}\text{N}$   $[\text{M}+\text{H}]^+$ : 264.17468; Found: 264.17435.

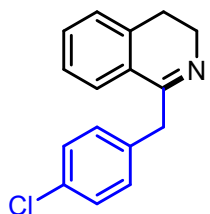

**1-(4-chlorobenzyl)-3,4-dihydroisoquinoline (3f):** New compound, a yellow oil (21.4 mg, yield: 42%),  $^1\text{H}$  NMR (400 MHz,  $\text{CDCl}_3$ )  $\delta$  8.13 (d,  $J = 7.5$  Hz, 1H), 7.43 (t,  $J = 7.0$  Hz, 1H), 7.36 (t,  $J = 7.4$  Hz, 1H), 7.31-7.28 (m, 4H), 7.16 (d,  $J = 7.3$  Hz, 1H), 4.75 (s, 2H), 3.48 (t,  $J = 6.6$  Hz, 2H), 2.94 (t,  $J = 6.6$  Hz, 2H) ppm.  $^{13}\text{C}$  NMR (100 MHz,  $\text{CDCl}_3$ )  $\delta$  164.73, 138.11, 136.15, 133.41, 131.96, 129.56, 129.32, 128.92, 128.58, 127.25, 127.08, 50.03, 45.59, 28.20 ppm. HRMS (ESI)  $m/z$  Calcd for  $\text{C}_{16}\text{H}_{14}\text{NCl}$   $[\text{M}+\text{H}]^+$ : 256.08875; Found: 256.08829.

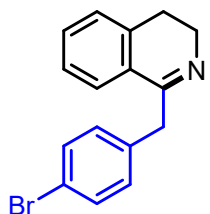

**1-bromobenzyl)-3,4-dihydroisoquinoline (3g)<sup>7</sup>:** Known compound, a yellow oil (29.9 mg, yield: 50%),  $^1\text{H}$  NMR (600 MHz,  $\text{CDCl}_3$ )  $\delta$  8.14 (dd,  $J = 7.7, 1.1$  Hz, 1H), 7.45 (d,  $J = 8.4$  Hz, 2H), 7.42 (dd,  $J = 7.5, 1.4$  Hz, 1H), 7.36 (t,  $J = 7.5$  Hz, 1H), 7.22 (d,  $J = 8.4$  Hz, 2H), 7.17 (d,  $J = 7.5$  Hz, 1H), 4.74 (s, 2H), 3.47 (t,  $J = 6.6$  Hz, 2H), 2.94 (t,  $J = 6.6$  Hz, 2H) ppm.  $^{13}\text{C}$  NMR (150 MHz,  $\text{CDCl}_3$ )  $\delta$  164.77, 138.12, 136.70, 132.07, 131.99, 131.90, 129.93, 129.79, 129.33, 128.62, 127.29, 127.09, 121.52, 50.12, 45.62, 28.23 ppm. HRMS (ESI)  $m/z$  Calcd for  $\text{C}_{16}\text{H}_{14}\text{NBr}$   $[\text{M}+\text{H}]^+$ : 300.03824; Found: 300.03827.

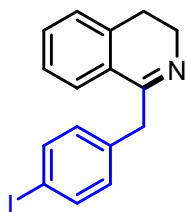

**1-(4-iodobenzyl)-3,4-dihydroisoquinoline (3h):** New compound, a yellow oil (39.6 mg, yield: 57%),  $^1\text{H NMR}$  (600 MHz,  $\text{CDCl}_3$ )  $\delta$  8.13 (d,  $J = 7.7$  Hz, 1H), 7.65 (d,  $J = 8.3$  Hz, 2H), 7.43 (td,  $J = 7.4, 1.3$  Hz, 1H), 7.36 (t,  $J = 7.5$  Hz, 1H), 7.16 (d,  $J = 7.5$  Hz, 1H), 7.09 (d,  $J = 8.3$  Hz, 2H), 4.73 (s, 2H), 3.47 (t,  $J = 6.7$  Hz, 2H), 2.94 (t,  $J = 6.7$  Hz, 2H) ppm.  $^{13}\text{C NMR}$  (150 MHz,  $\text{CDCl}_3$ )  $\delta$  164.78, 138.12, 137.88, 137.37, 131.99, 130.19, 129.32, 128.62, 127.29, 127.09, 93.03, 50.21, 45.63, 28.23 ppm. **HRMS (ESI) m/z** Calcd for  $\text{C}_{16}\text{H}_{14}\text{NI}$   $[\text{M}+\text{H}]^+$ : 348.02437; Found: 348.02332.

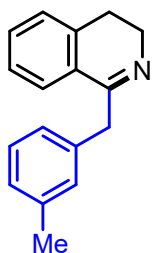

**1-(3-methylbenzyl)-3,4-dihydroisoquinoline (3i):** New compound, a yellow oil (24.9 mg, yield: 53%),  $^1\text{H NMR}$  (600 MHz,  $\text{CDCl}_3$ )  $\delta$  8.16 (d,  $J = 7.4$  Hz, 1H), 7.42 (td,  $J = 7.3, 1.0$  Hz, 1H), 7.36 (t,  $J = 7.3$  Hz, 1H), 7.22 (t,  $J = 7.5$  Hz, 1H), 7.16 (t,  $J = 6.3$  Hz, 3H), 7.13-7.07(m, 1H), 4.77 (s, 2H), 3.48 (t,  $J = 6.6$  Hz, 2H), 2.94 (t,  $J = 6.6$  Hz, 2H), 2.34 (s, 3H) ppm.  $^{13}\text{C NMR}$  (150 MHz,  $\text{CDCl}_3$ )  $\delta$  164.64, 138.45, 138.19, 137.48, 131.78, 129.54, 128.87, 128.60, 128.56, 128.32, 127.16, 127.01, 125.23, 50.46, 45.39, 28.20, 21.50 ppm. **HRMS (ESI) m/z** Calcd for  $\text{C}_{17}\text{H}_{17}\text{N}$   $[\text{M}+\text{H}]^+$ : 236.14338; Found: 236.14311.

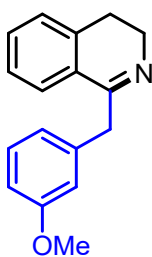

**1-(3-methoxybenzyl)-3,4-dihydroisoquinoline (3j):** New compound, a yellow oil (19.1 mg, yield: 38%),  $^1\text{H NMR}$  (400 MHz,  $\text{CDCl}_3$ )  $\delta$  8.15 (d,  $J = 7.6$  Hz, 1H), 7.42 (t,  $J = 7.3$  Hz, 1H), 7.35 (t,  $J = 7.4$  Hz, 1H), 7.23 (d,  $J = 8.1$  Hz, 1H), 7.16 (d,  $J = 7.2$  Hz, 1H), 6.92 (d,  $J = 7.6$  Hz, 1H), 6.88 (s, 1H), 6.82 (d,  $J = 8.2$  Hz, 1H), 4.77 (s, 2H), 3.78 (s, 3H), 3.49 (t,  $J = 6.3$  Hz, 2H), 2.94 (t,  $J = 6.3$  Hz, 2H) ppm.  $^{13}\text{C NMR}$  (100 MHz,  $\text{CDCl}_3$ )  $\delta$  163.46, 138.67, 137.26, 137.03, 134.74, 131.66, 131.43, 129.03, 128.88, 128.79, 128.59, 125.38, 121.16, 50.72, 45.33, 27.83, 21.63 ppm. **HRMS (ESI) m/z** Calcd for  $\text{C}_{17}\text{H}_{17}\text{NO}$   $[\text{M}+\text{H}]^+$ : 252.13829; Found: 252.13834.

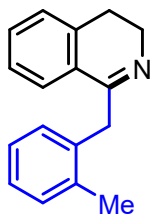

**1-(2-methylbenzyl)-3,4-dihydroisoquinoline (3k):** New compound, a yellow oil (25.4 mg, yield: 54%),  $^1\text{H NMR}$  (400 MHz,  $\text{CDCl}_3$ )  $\delta$  8.16 (d,  $J = 7.7$  Hz, 1H), 7.43 (td,  $J = 7.4, 1.4$  Hz, 1H), 7.37 (t,  $J = 7.2$  Hz, 1H), 7.25-7.21 (m, 2H), 7.20-7.16 (m, 3H), 4.82 (s, 2H), 3.44 (t,  $J = 6.6$  Hz, 2H), 2.93 (t,  $J = 6.6$  Hz, 2H), 2.34 (s, 3H) ppm.  $^{13}\text{C NMR}$  (100 MHz,  $\text{CDCl}_3$ )  $\delta$  164.58, 138.15, 136.93, 135.01, 131.83, 130.71, 129.51, 128.62, 127.65, 127.21, 127.02, 126.18, 48.32, 44.98, 28.17, 19.41 ppm. **HRMS (ESI) m/z** Calcd for  $\text{C}_{17}\text{H}_{17}\text{N}$   $[\text{M}+\text{H}]^+$ : 236.14338; Found: 236.14305.

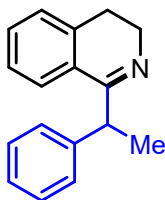

**1-(1-phenylethyl)-3,4-dihydroisoquinoline (3l):** New compound, a yellow oil (23.5 mg, yield: 50%),  $^1\text{H NMR}$  (400 MHz,  $\text{CDCl}_3$ )  $\delta$  8.15 (dt,  $J = 7.5, 1.5$  Hz, 1H), 7.41-7.38 (m, 3H), 7.37-7.32 (m, 3H), 7.30-7.27 (m, 1H), 7.13 (dd,  $J = 7.3, 0.6$  Hz, 1H), 6.26 (q,  $J = 7.1$  Hz, 1H), 3.42-3.35 (m, 1H), 3.14-3.08 (m, 1H), 2.82 (t,  $J = 6.5$  Hz, 2H), 1.60 (d,  $J = 7.1$  Hz, 3H) ppm.  $^{13}\text{C NMR}$  (100 MHz,  $\text{CDCl}_3$ )  $\delta$  164.36, 140.93, 138.14, 131.75, 129.87, 128.67, 128.59, 127.46, 127.44, 127.18, 126.93, 50.35, 40.24, 28.46, 15.81 ppm. **HRMS (ESI) m/z** Calcd for  $\text{C}_{17}\text{H}_{17}\text{N}$   $[\text{M}+\text{H}]^+$ : 236.14338; Found: 236.14304.

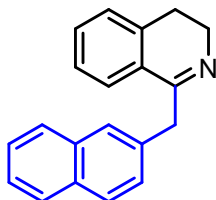

**1-(naphthalen-2-ylmethyl)-3,4-dihydroisoquinoline (3m):** New compound, a yellow oil (20.6 mg, yield: 38%),  $^1\text{H NMR}$  (400 MHz,  $\text{CDCl}_3$ )  $\delta$  8.19 (dd,  $J = 7.6, 1.1$  Hz, 1H), 7.84-7.81 (m, 3H), 7.77 (s, 1H), 7.51-7.44 (m, 3H), 7.42 (dd,  $J = 7.3, 1.5$  Hz, 1H), 7.38 (t,  $J = 7.0$  Hz, 1H), 7.16 (d,  $J = 7.2$  Hz, 1H), 4.96 (s, 2H), 3.51 (t,  $J = 6.6$  Hz, 2H), 2.92 (t,  $J = 6.6$  Hz, 2H) ppm.  $^{13}\text{C NMR}$  (100 MHz,  $\text{CDCl}_3$ )  $\delta$  164.80, 138.21, 135.13, 133.44, 132.97, 131.89, 129.52, 128.71, 128.64, 127.84, 127.83, 127.24, 127.07, 127.00, 126.37, 126.31, 126.03, 50.64, 45.34, 28.24 ppm. **HRMS (ESI) m/z** Calcd for  $\text{C}_{20}\text{H}_{17}\text{N}$   $[\text{M}+\text{H}]^+$ : 272.14338; Found: 272.14255.

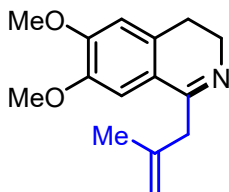

**6,7-dimethoxy-1-(2-methylallyl)-3,4-dihydroisoquinoline (3n):** New compound, a yellow oil (13.2 mg, yield: 27%),  $^1\text{H NMR}$  (400 MHz,  $\text{CDCl}_3$ )  $\delta$  7.61 (s, 1H), 6.62 (s, 1H), 4.91 (s, 1H), 4.88 (s, 1H), 4.12 (s, 2H), 3.91 (s, 3H), 3.90 (s, 3H), 3.40 (t,  $J = 6.7$  Hz, 2H), 2.84 (t,  $J = 6.7$  Hz,

2H), 1.73 (s, 3H) ppm.  $^{13}\text{C}$  NMR (100 MHz,  $\text{CDCl}_3$ )  $\delta$  164.63, 151.97, 148.17, 141.36, 131.88, 122.20, 112.81, 110.91, 109.45, 56.27, 56.23, 52.78, 45.44, 27.92, 20.26 ppm. HRMS (ESI)  $m/z$  Calcd for  $\text{C}_{15}\text{H}_{19}\text{NO}_2$   $[\text{M}+\text{H}]^+$ : 246.14886; Found: 246.14926.

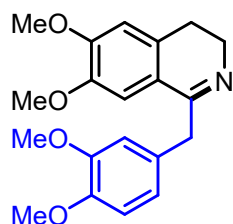

**1-(3,4-dimethoxybenzyl)-6,7-dimethoxy-3,4-dihydroisoquinoline (3o)**<sup>8</sup>: Known compound, a white solid (11.9 mg, yield: 35%), mp 98~100 °C.  $^1\text{H}$  NMR (600 MHz,  $\text{CDCl}_3$ )  $\delta$  7.65 (s, 1H), 6.87 (s, 1H), 6.86 (s, 1H), 6.81 (d,  $J = 7.9$  Hz, 1H), 6.61 (s, 1H), 4.70 (s, 2H), 3.94 (s, 3H), 3.90 (s, 3H), 3.86 (s, 3H), 3.85 (s, 3H), 3.45 (t,  $J = 6.7$  Hz, 2H), 2.85 (t,  $J = 6.7$  Hz, 2H) ppm.  $^{13}\text{C}$  NMR (150 MHz,  $\text{CDCl}_3$ )  $\delta$  164.70, 151.96, 149.35, 148.58, 148.13, 131.77, 130.39, 122.10, 120.63, 111.38, 111.12, 110.83, 109.40, 56.24, 56.16, 56.09, 56.04, 50.19, 45.40, 27.88 ppm. HRMS (ESI)  $m/z$  Calcd for  $\text{C}_{20}\text{H}_{23}\text{NO}_4$   $[\text{M}+\text{H}]^+$ : 342.16998; Found: 342.16965.

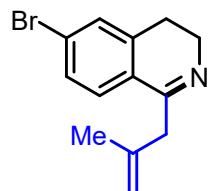

**6-bromo-1-(2-methylallyl)-3,4-dihydroisoquinoline (3p)**: New compound, a yellow oil (21.0 mg, yield: 40%),  $^1\text{H}$  NMR (400 MHz,  $\text{CDCl}_3$ )  $\delta$  8.23 (d,  $J = 1.5$  Hz, 1H), 7.52 (dd,  $J = 7.9, 1.6$  Hz, 1H), 7.06 (d,  $J = 8.0$  Hz, 1H), 4.93 (s, 1H), 4.88 (s, 1H), 4.14 (s, 2H), 3.47 (t,  $J = 6.6$  Hz, 2H), 2.93 (t,  $J = 6.6$  Hz, 2H), 1.74 (s, 3H) ppm.  $^{13}\text{C}$  NMR (100 MHz,  $\text{CDCl}_3$ )  $\delta$  163.20, 140.77, 136.95, 134.60, 131.51, 131.34, 128.76, 121.05, 113.06, 52.82, 44.95, 27.74, 20.16 ppm. HRMS (ESI)  $m/z$  Calcd for  $\text{C}_{13}\text{H}_{14}\text{BrN}$   $[\text{M}+\text{H}]^+$ : 264.03824; Found: 264.03816.

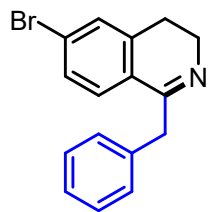

**1-benzyl-6-bromo-3,4-dihydroisoquinoline (3q)**: New compound, a yellow oil (19.1 mg, yield: 32%),  $^1\text{H}$  NMR (400 MHz,  $\text{CDCl}_3$ )  $\delta$  8.28 (d,  $J = 1.5$  Hz, 1H), 7.53 (dd,  $J = 8.0, 1.8$  Hz, 1H), 7.37-7.28 (m, 5H), 7.04 (d,  $J = 8.0$  Hz, 1H), 4.78 (s, 2H), 3.47 (t,  $J = 6.6$  Hz, 2H), 2.88 (t,  $J = 6.6$  Hz, 2H) ppm.  $^{13}\text{C}$  NMR (100 MHz,  $\text{CDCl}_3$ )  $\delta$  163.50, 137.33, 137.02, 134.77, 131.65, 131.36, 128.93, 128.89, 128.30, 127.82, 121.16, 50.79, 45.39, 27.82 ppm. HRMS (ESI)  $m/z$  Calcd for  $\text{C}_{16}\text{H}_{14}\text{BrN}$   $[\text{M}+\text{H}]^+$ : 300.03824; Found: 300.03857.

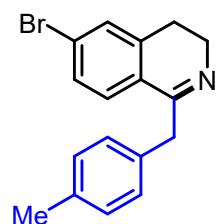



**6-bromo-1-(4-methylbenzyl)-3,4-dihydroisoquinoline (3r):** New compound, a yellow oil (23.8 mg, yield: 38%).  $^1\text{H NMR}$  (400 MHz,  $\text{CDCl}_3$ )  $\delta$  8.28 (s, 1H), 7.52 (d,  $J = 7.9$  Hz, 1H), 7.21 (d,  $J = 7.5$  Hz, 2H), 7.14 (d,  $J = 7.3$  Hz, 2H), 7.03 (d,  $J = 7.9$  Hz, 1H), 4.74 (s, 2H), 3.45 (t,  $J = 6.1$  Hz, 2H), 2.87 (t,  $J = 6.1$  Hz, 2H), 2.33 (s, 3H) ppm.  $^{13}\text{C NMR}$  (100 MHz,  $\text{CDCl}_3$ )  $\delta$  163.33, 137.41, 136.92, 134.61, 134.17, 131.52, 129.49, 128.76, 128.22, 50.38, 45.14, 27.72, 21.24 ppm. **HRMS (ESI) m/z** Calcd for  $\text{C}_{17}\text{H}_{16}\text{BrN}$   $[\text{M}+\text{H}]^+$ : 314.05389; Found: 314.05469.

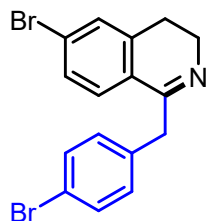

**6-bromo-1-(4-bromobenzyl)-3,4-dihydroisoquinoline (3s):** New compound, a yellow oil (26.4 mg, yield: 35%).  $^1\text{H NMR}$  (400 MHz,  $\text{CDCl}_3$ )  $\delta$  8.26 (d,  $J = 1.6$  Hz, 1H), 7.53 (dd,  $J = 8.0, 1.8$  Hz, 1H), 7.45 (d,  $J = 8.2$  Hz, 2H), 7.20 (d,  $J = 8.2$  Hz, 2H), 7.05 (d,  $J = 8.0$  Hz, 1H), 4.72 (s, 2H), 3.46 (t,  $J = 6.6$  Hz, 2H), 2.89 (t,  $J = 6.6$  Hz, 2H) ppm.  $^{13}\text{C NMR}$  (100 MHz,  $\text{CDCl}_3$ )  $\delta$  163.56, 136.93, 136.41, 134.93, 132.07, 131.81, 131.65, 131.14, 130.03, 128.94, 128.80, 121.78, 121.24, 50.31, 45.51, 27.80 ppm. **HRMS (ESI) m/z** Calcd for  $\text{C}_{16}\text{H}_{13}\text{Br}_2\text{N}$   $[\text{M}+\text{H}]^+$ : 377.94875; Found: 377.94797.

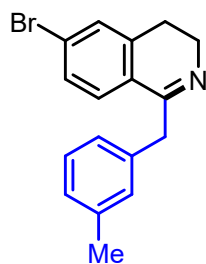

**6-bromo-1-(3-methylbenzyl)-3,4-dihydroisoquinoline (3t):** New compound, a yellow oil (26.3 mg, yield: 42%).  $^1\text{H NMR}$  (400 MHz,  $\text{CDCl}_3$ )  $\delta$  8.28 (s, 1H), 7.53 (d,  $J = 8.0$  Hz, 1H), 7.22 (t,  $J = 7.4$  Hz, 1H), 7.13-7.09 (m, 3H), 7.04 (d,  $J = 8.0$  Hz, 1H), 4.74 (s, 2H), 3.47 (t,  $J = 6.5$  Hz, 2H), 2.88 (t,  $J = 6.5$  Hz, 2H), 2.33 (s, 3H) ppm.  $^{13}\text{C NMR}$  (100 MHz,  $\text{CDCl}_3$ )  $\delta$  163.46, 138.67, 137.26, 137.03, 134.74, 131.66, 131.43, 129.03, 128.88, 128.79, 128.59, 125.38, 121.16, 50.72, 45.33, 27.83, 21.63 ppm. **HRMS (ESI) m/z** Calcd for  $\text{C}_{17}\text{H}_{16}\text{BrN}$   $[\text{M}+\text{H}]^+$ : 314.05389; Found: 314.05408.

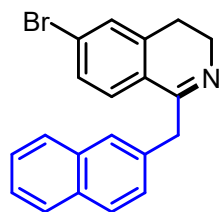

**6-bromo-1-(naphthalen-2-ylmethyl)-3,4-dihydroisoquinoline (3u):** New compound, a yellow oil (29.3 mg, yield: 42%).  $^1\text{H NMR}$  (400 MHz,  $\text{CDCl}_3$ )  $\delta$  8.31 (d,  $J = 2.0$  Hz, 1H), 7.83-7.81 (m, 3H), 7.75 (s, 1H), 7.53 (dd,  $J = 8.0, 2.1$  Hz, 1H), 7.49-7.43 (m, 3H), 7.03 (d,  $J = 8.0$  Hz, 1H), 4.93 (s, 2H), 3.48 (t,  $J = 6.6$  Hz, 2H), 2.86 (t,  $J = 6.6$  Hz, 2H) ppm.  $^{13}\text{C NMR}$  (100 MHz,  $\text{CDCl}_3$ )  $\delta$  163.47, 136.92, 134.73, 134.70, 133.40, 132.98, 131.55, 131.23, 128.81, 128.79, 127.83, 127.81, 127.08,

126.43, 126.20, 126.11, 121.06, 50.74, 45.13, 27.69 ppm. **HRMS (ESI) m/z** Calcd for C<sub>20</sub>H<sub>16</sub>BrN [M+H]<sup>+</sup>:350.05389; Found:350.05345.

## 5. References

1. N. Nayek, P. Karmakar, M. Mandal, I. Karmakar and G. Brahmachari, Photochemical and Electrochemical Regioselective Cross-Dehydrogenative C(sp<sup>2</sup>)-H Sulfenylation and Selenylation of Substituted Benzo[*a*]phenazin-5-ols, *New J. Chem.*, 2022, **46**, 13483-13497.
2. D. Liu, C. Qiu, M. Li, Y. Xie, L. Chen, H. Lin, J. Long, Z. Zhang and X. Wang, One-Step Green Conversion of Benzyl Bromide to Aldehydes on NaOH-Modified g-C<sub>3</sub>N<sub>4</sub> with Dioxygen under LED Visible Light, *Catal. Sci. Technol.*, 2019, **9**, 3270–3278.
3. J. Li, H. Wang, L. Liu and J. Sun, Metal-free, Visible-Light Photoredox Catalysis: Transformation of Arylmethyl Bromides to Alcohols and Aldehydes, *RSC Adv.*, 2014, **4**, 49974-49978.
4. Y. Song, Z. Jiang, Y. Zhu, T.-Y. Sun, X.-F. Xia and D. Wang, Visible-Light-Induced Dehydrogenative β-Trifluoromethylthiolation of Tertiary Amines and Direct β-Trifluoromethylthiolation of Enamides, *Org. Chem. Front.*, 2023, **10**, 5284-5290.
5. Y. Zhang, Y. Liu, X. Ma, X. Ma, B. Wang, H. Li, Y. Huang and C. Liu, An Environmentally Friendly Approach to the Green Synthesis of Azo Dyes with Aryltriazenes via Ionic Liquid Promoted C-N Bonds Formation, *Dyes and Pigments*, 2018, **158**, 438-444.
6. C. Wu, J. Lin and X. Tian, Synthesis of Indolo[2,1-*a*]isoquinolines by Nickel-Catalyzed Mizoroki-Heck/Amination Cascade Reaction, *Org. Lett.*, 2023, **25**, 1, 158-162.
7. J.-H. Xie, P.-C. Yan, Q.-Q. Zhang, K.-X. Yuan and Q.-L. Zhou, Asymmetric Hydrogenation of Cyclic Imines Catalyzed by Chiral Spiro Iridium Phosphoramidite Complexes for Enantioselective Synthesis of Tetrahydroisoquinolines, *ACS Catal.*, 2012, **2**, 561–564.
8. D. Mujahidin and S. Doye, Enantioselective Synthesis of (+)-(*S*)-Laudanosine and (-)-(*S*)-Xylopinine, *Eur. J. Org. Chem.*, 2005, **13**, 2689-2693.

## 6. Copies of NMR spectra

### $^1\text{H}$ NMR of product 3a in $\text{CDCl}_3$ (600 MHz)

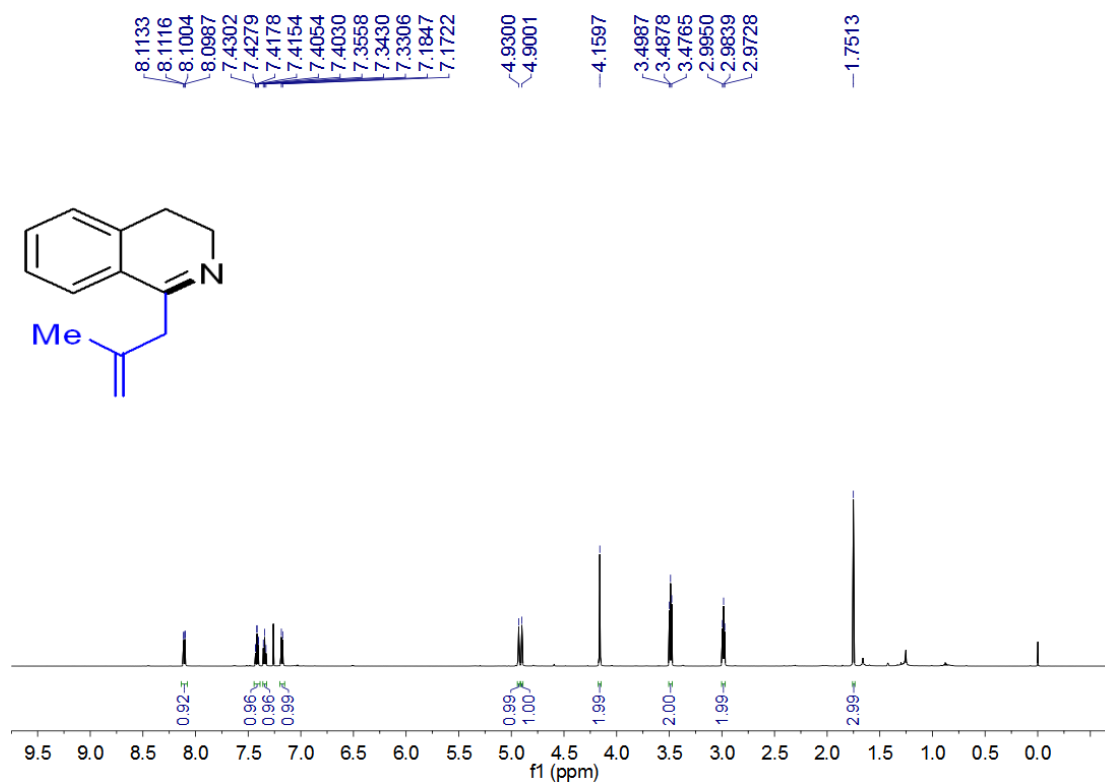

### $^{13}\text{C}$ NMR of product 3a in $\text{CDCl}_3$ (150 MHz)

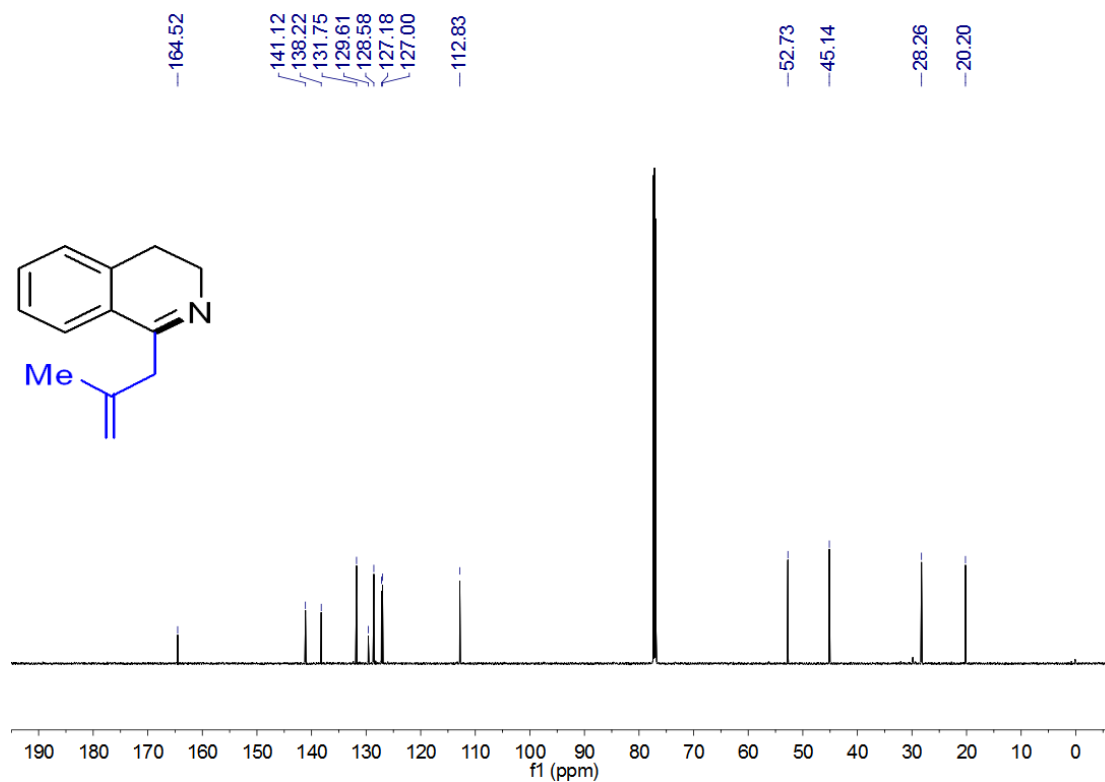

### $^1\text{H}$ NMR of product 3b in $\text{CDCl}_3$ (600 MHz)

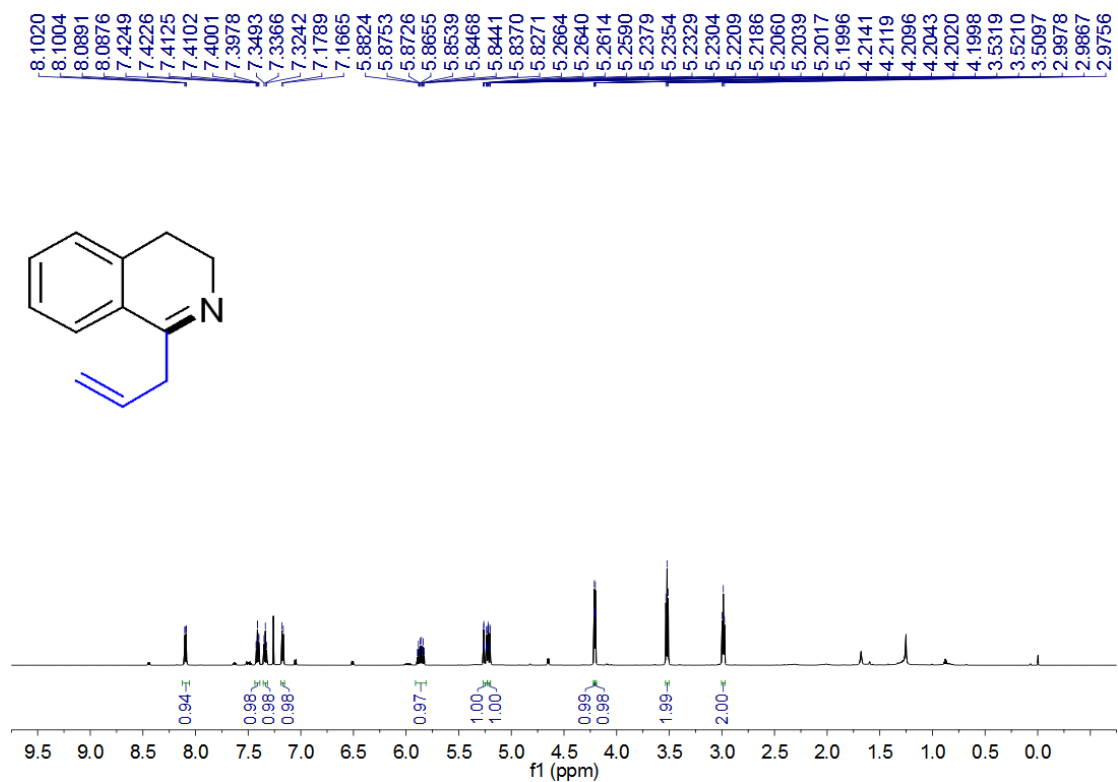

### $^{13}\text{C}$ NMR of product 3b in $\text{CDCl}_3$ (150 MHz)

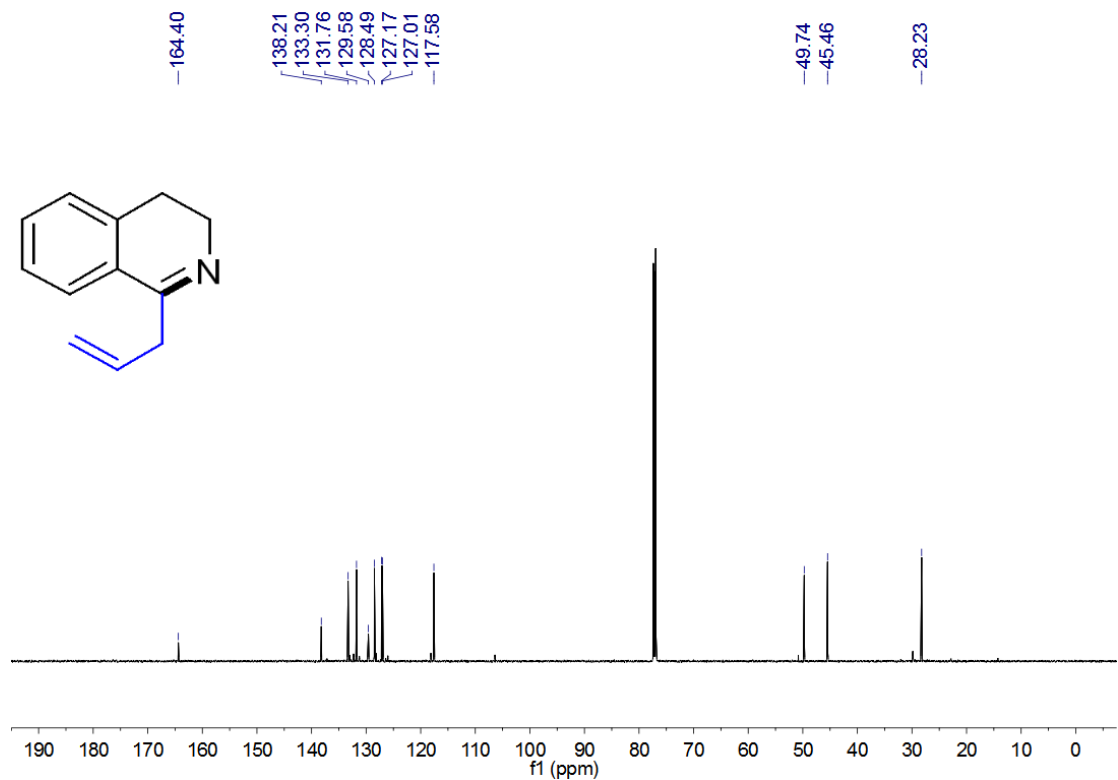

### $^1\text{H}$ NMR of product 3c in $\text{CDCl}_3$ (400 MHz)

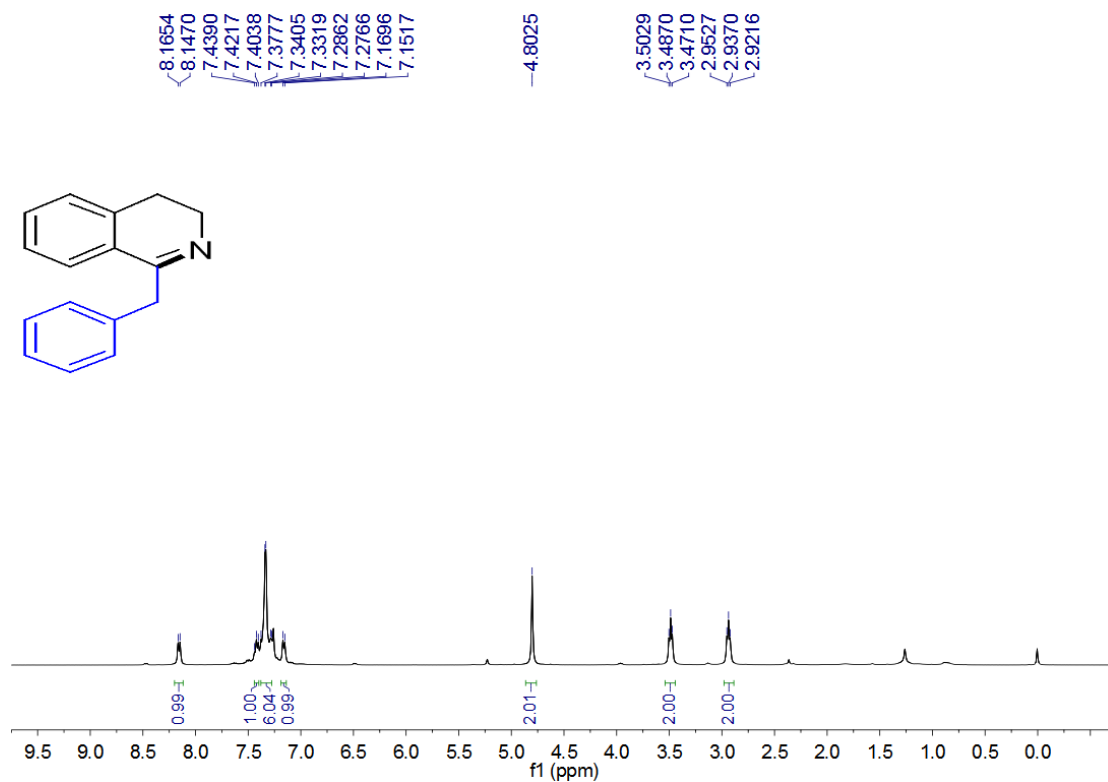

### $^{13}\text{C}$ NMR of product 3c in $\text{CDCl}_3$ (100 MHz)

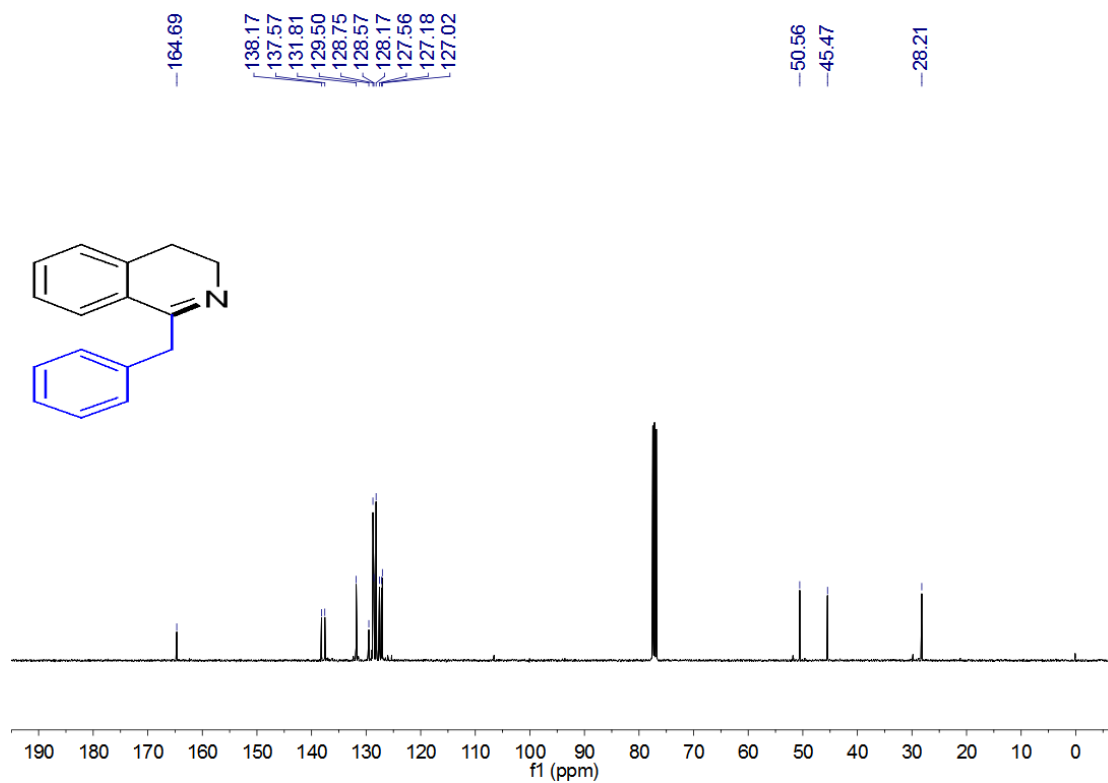

### <sup>1</sup>H NMR of product 3d in CDCl<sub>3</sub> (600 MHz)

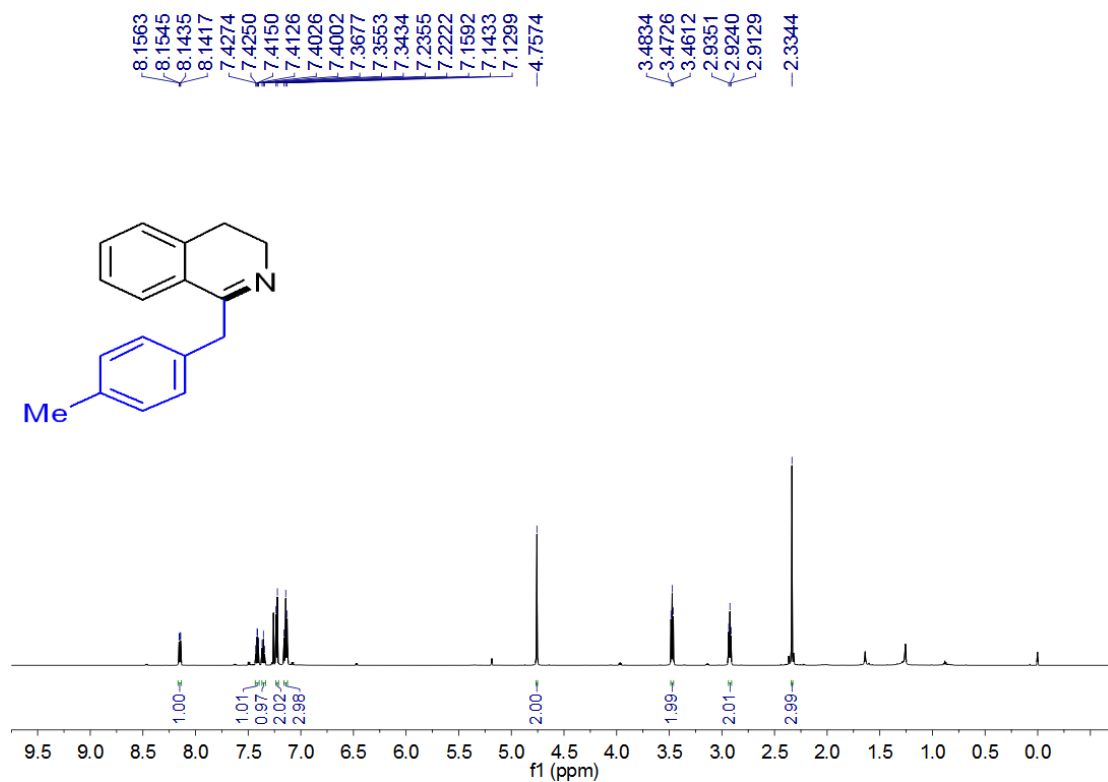

### <sup>13</sup>C NMR of product 3d in CDCl<sub>3</sub> (150 MHz)

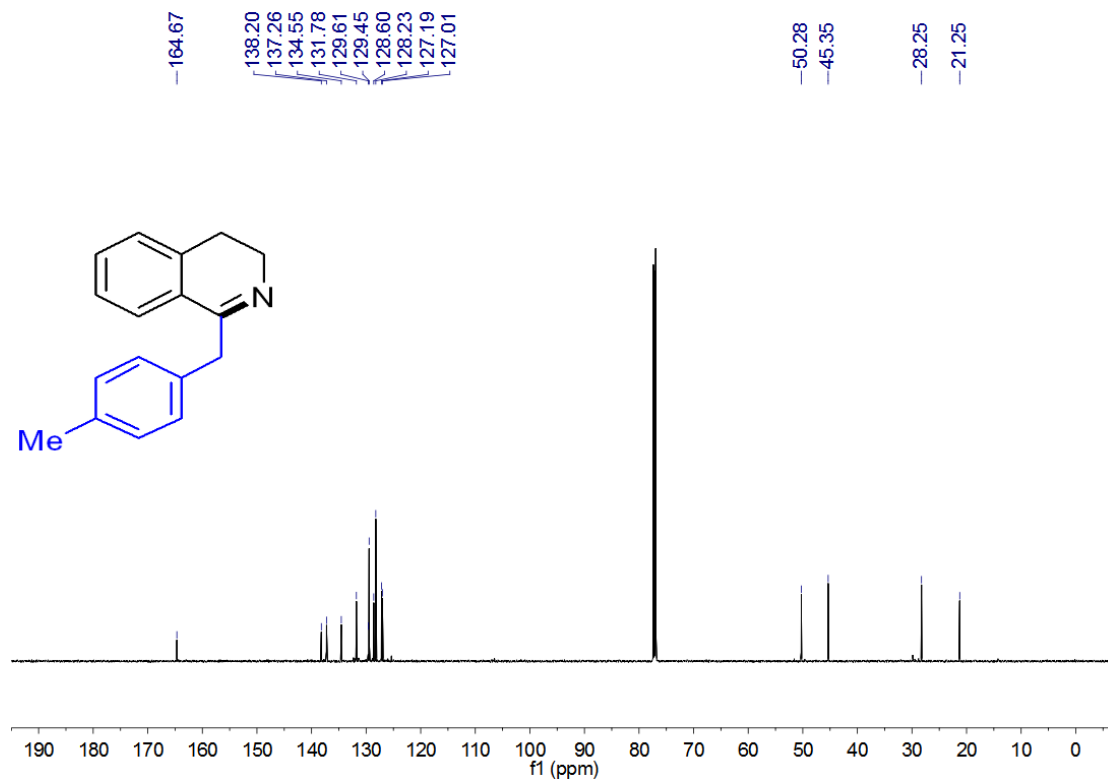

### $^1\text{H}$ NMR of product 3e in $\text{CDCl}_3$ (600 MHz)

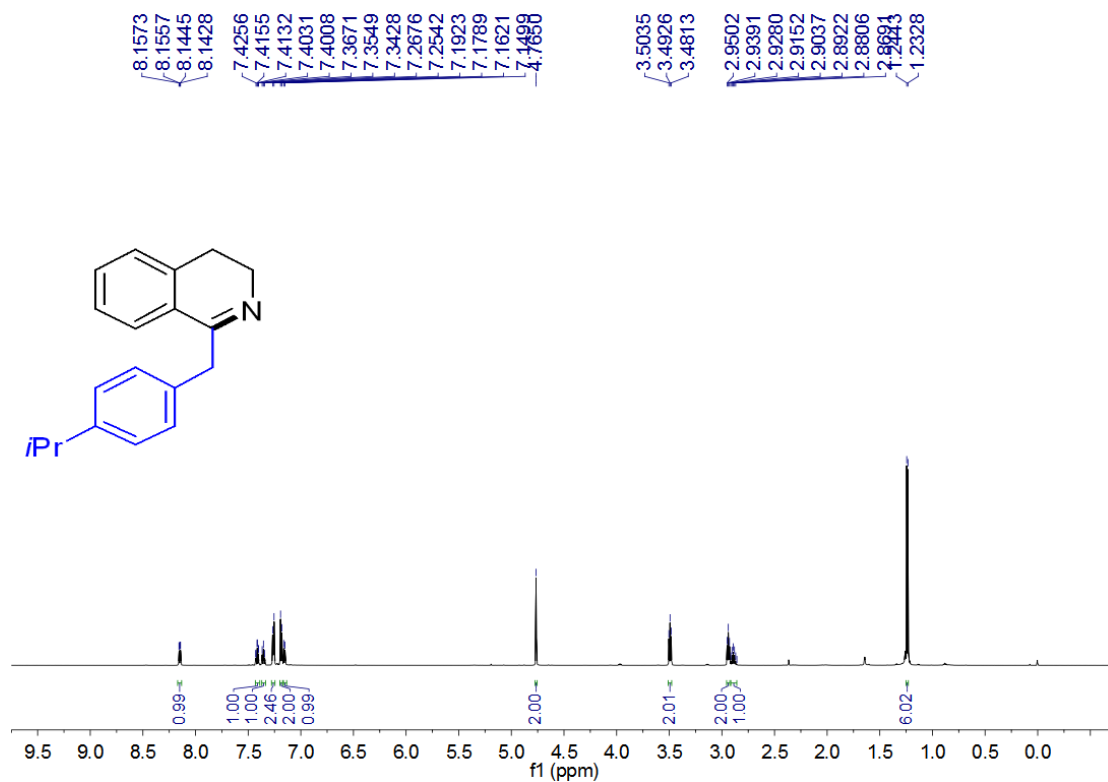

### $^{13}\text{C}$ NMR of product 3e in $\text{CDCl}_3$ (150 MHz)

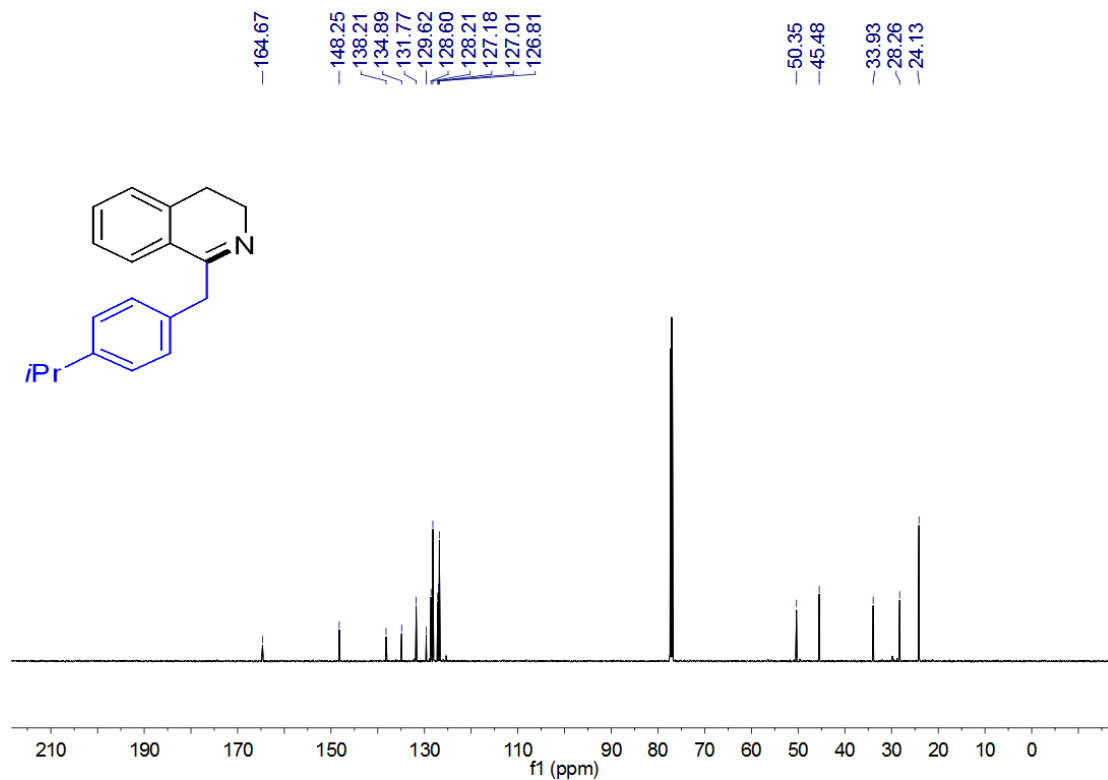

### $^1\text{H}$ NMR of product 3f in $\text{CDCl}_3$ (400 MHz)

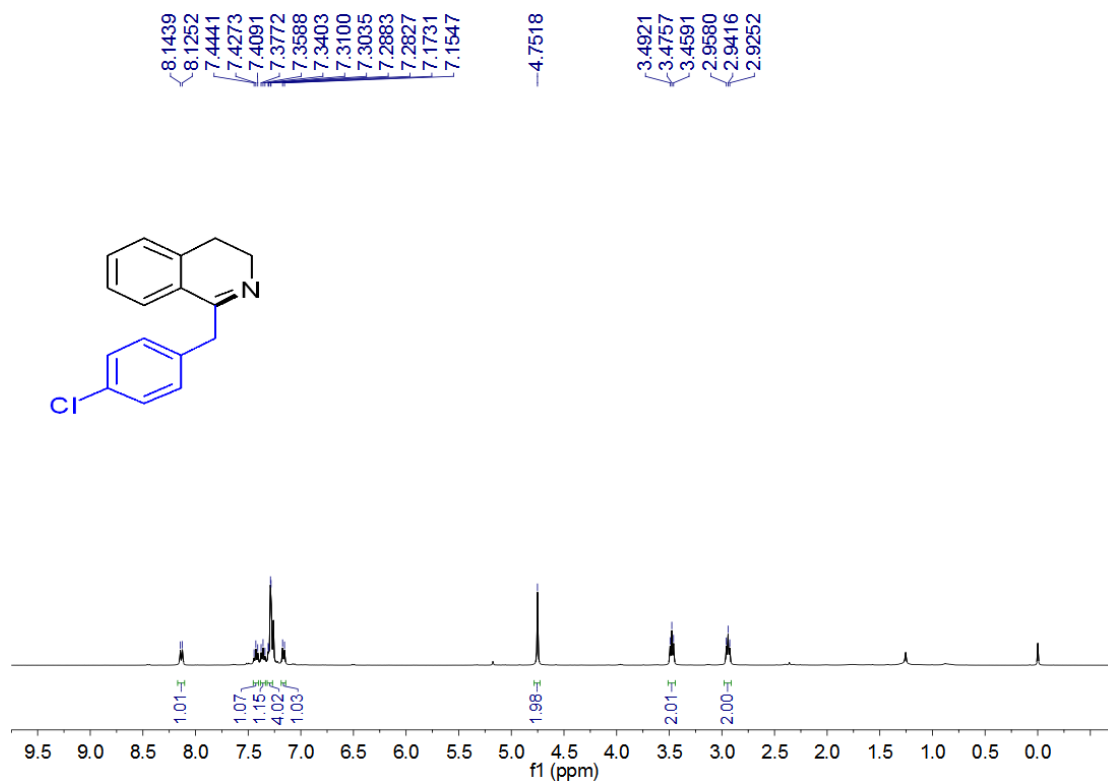

### $^{13}\text{C}$ NMR of product 3f in $\text{CDCl}_3$ (100 MHz)

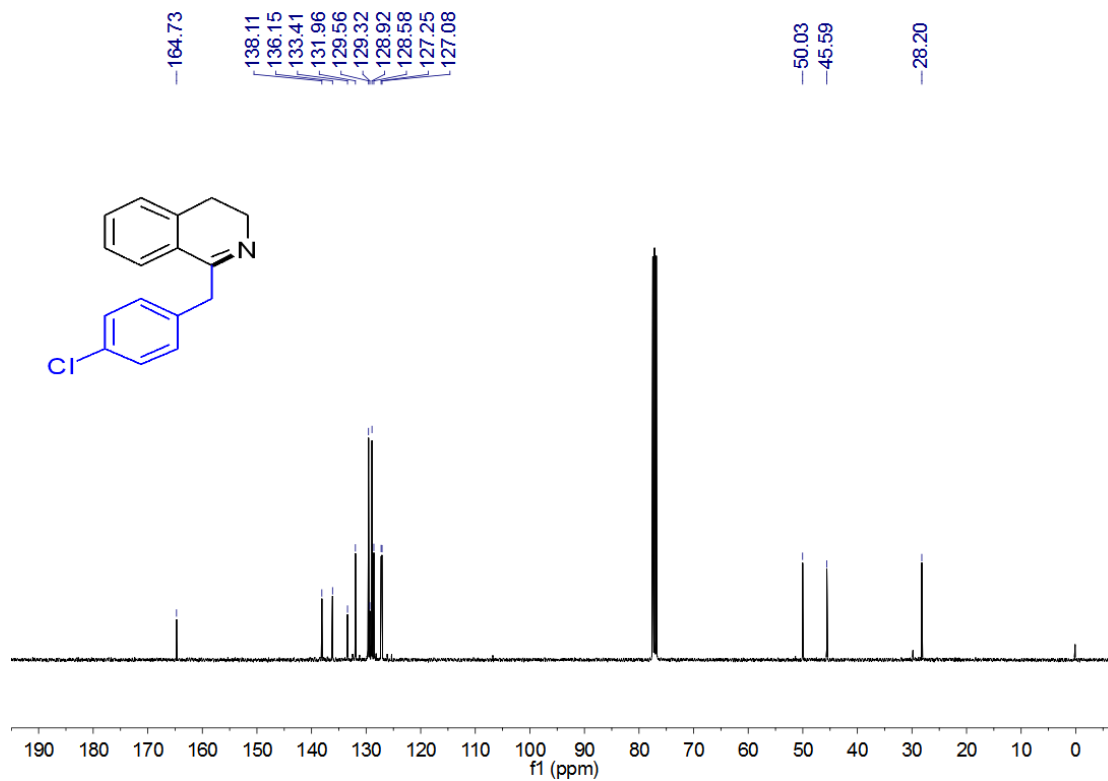



### $^1\text{H}$ NMR of product 3g in $\text{CDCl}_3$ (600 MHz)

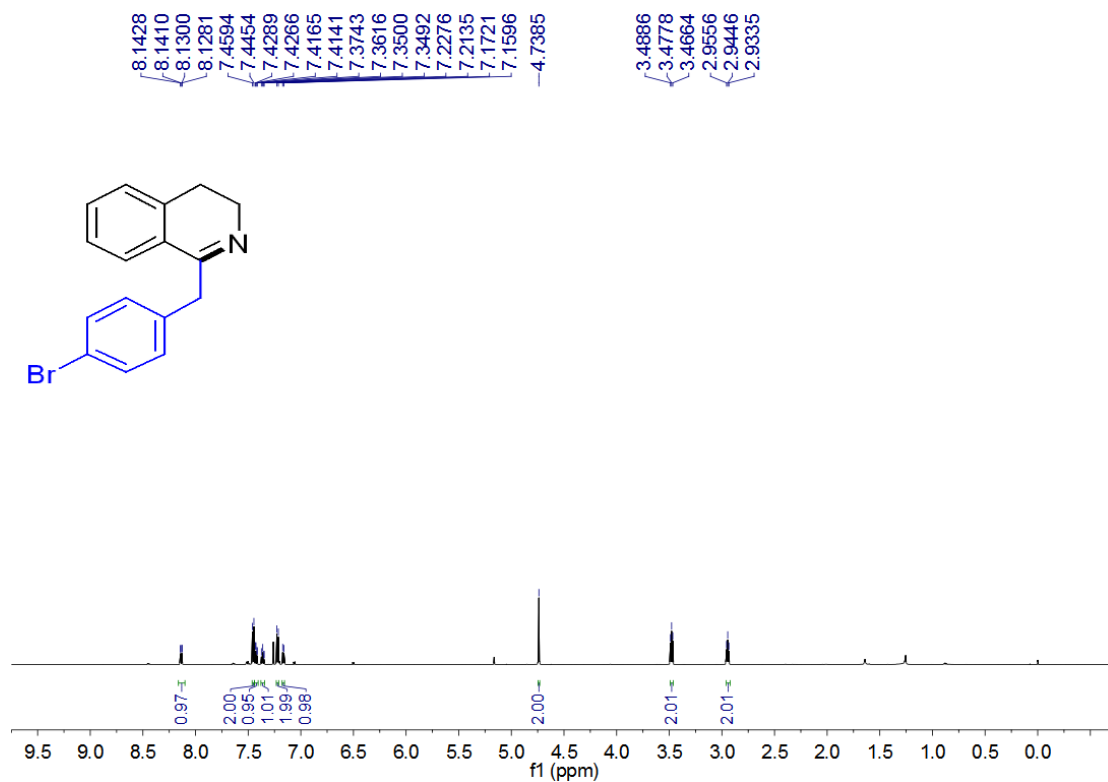

### $^{13}\text{C}$ NMR of product 3g in $\text{CDCl}_3$ (150 MHz)

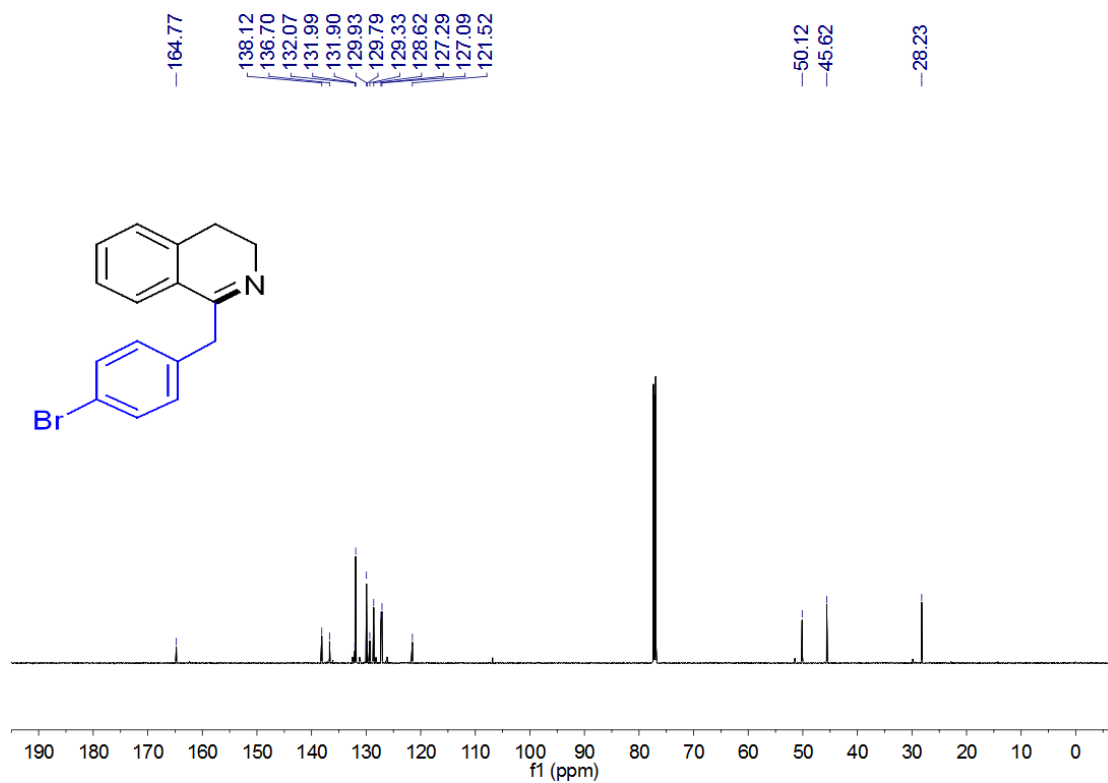

### $^1\text{H}$ NMR of product 3h in $\text{CDCl}_3$ (600 MHz)

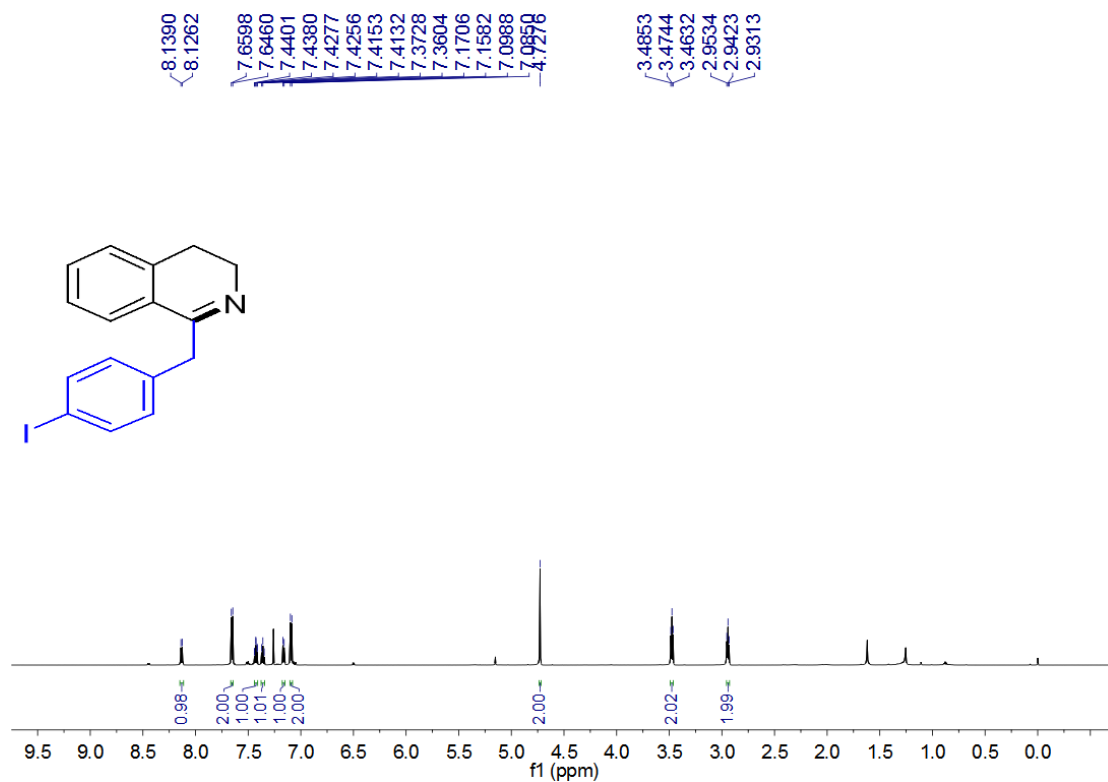

### $^{13}\text{C}$ NMR of product 3h in $\text{CDCl}_3$ (150 MHz)

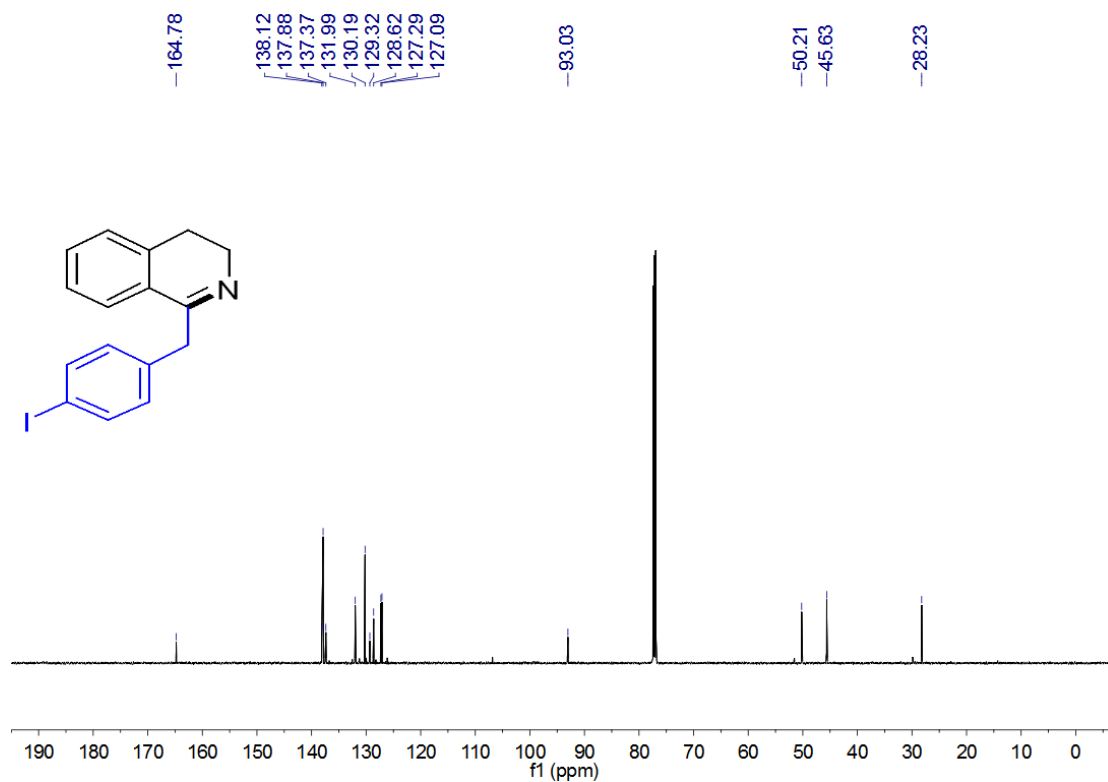

### <sup>1</sup>H NMR of product 3i in CDCl<sub>3</sub> (600 MHz)

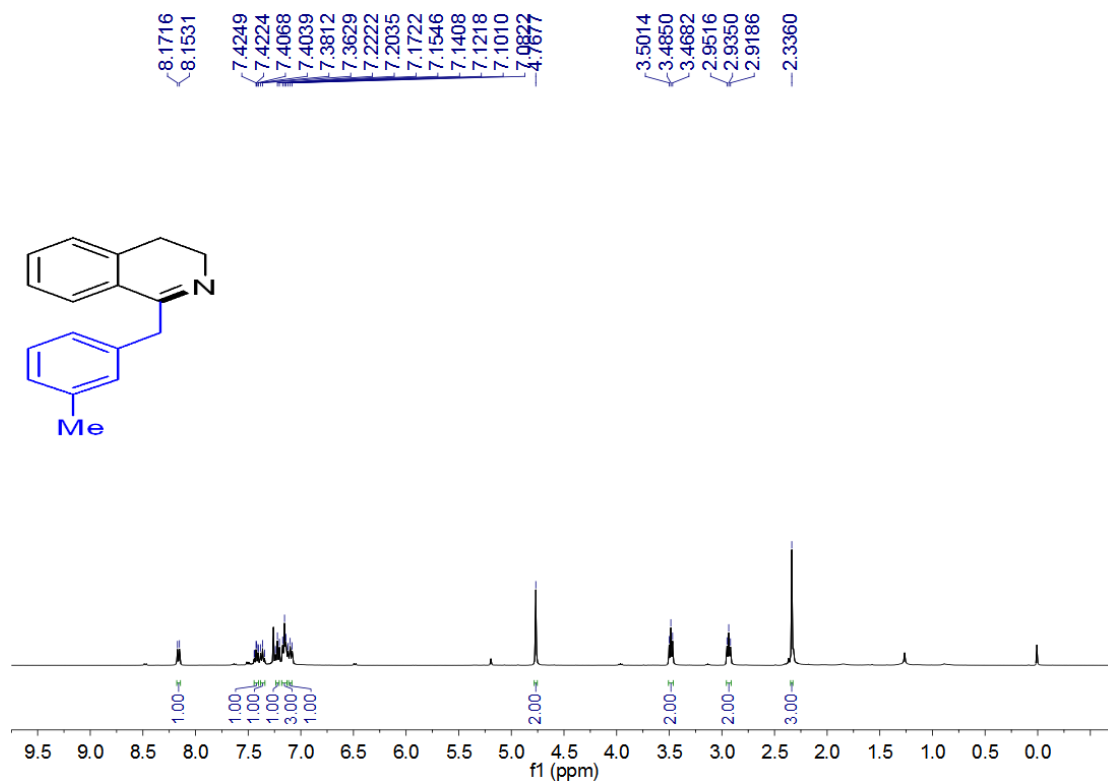

### <sup>13</sup>C NMR of product 3i in CDCl<sub>3</sub> (150 MHz)

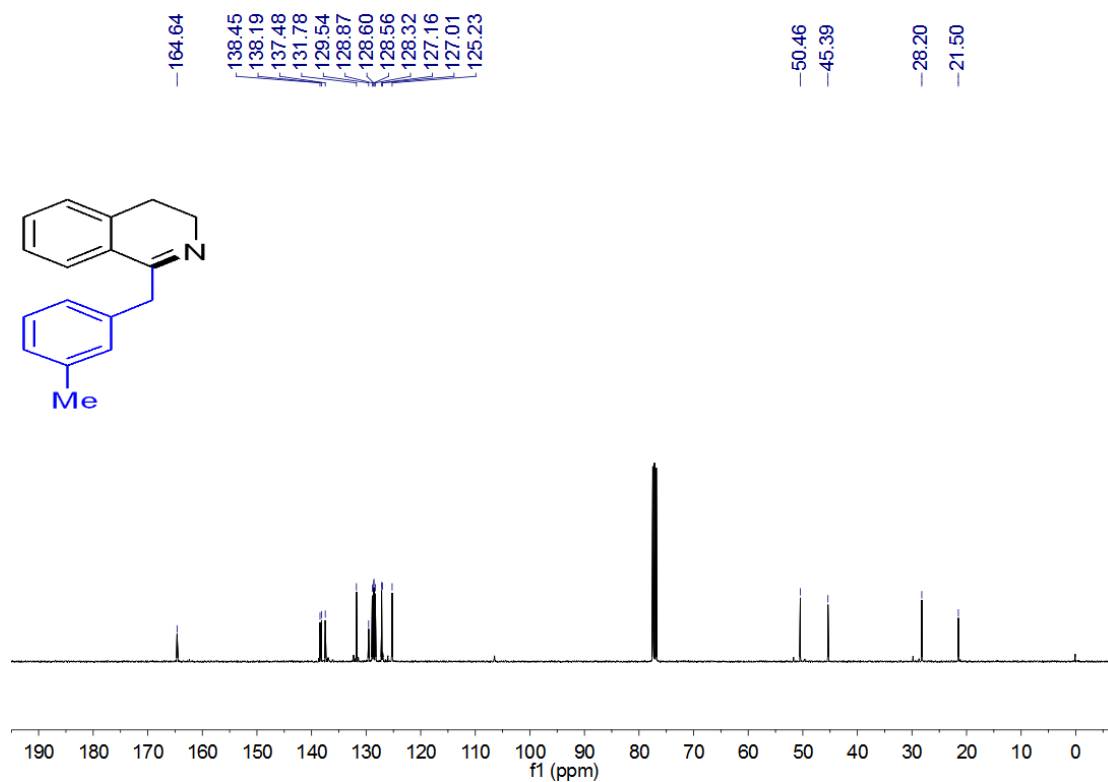

### $^1\text{H}$ NMR of product 3j in $\text{CDCl}_3$ (400 MHz)

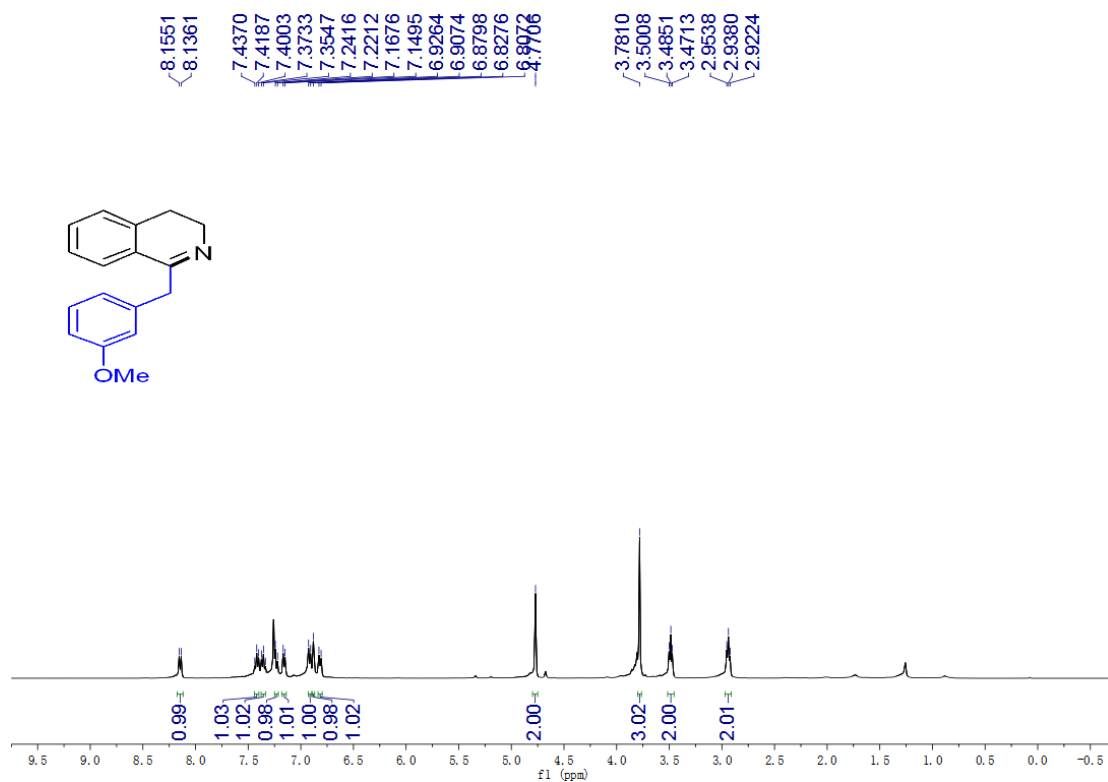

### $^{13}\text{C}$ NMR of product 3j in $\text{CDCl}_3$ (100 MHz)

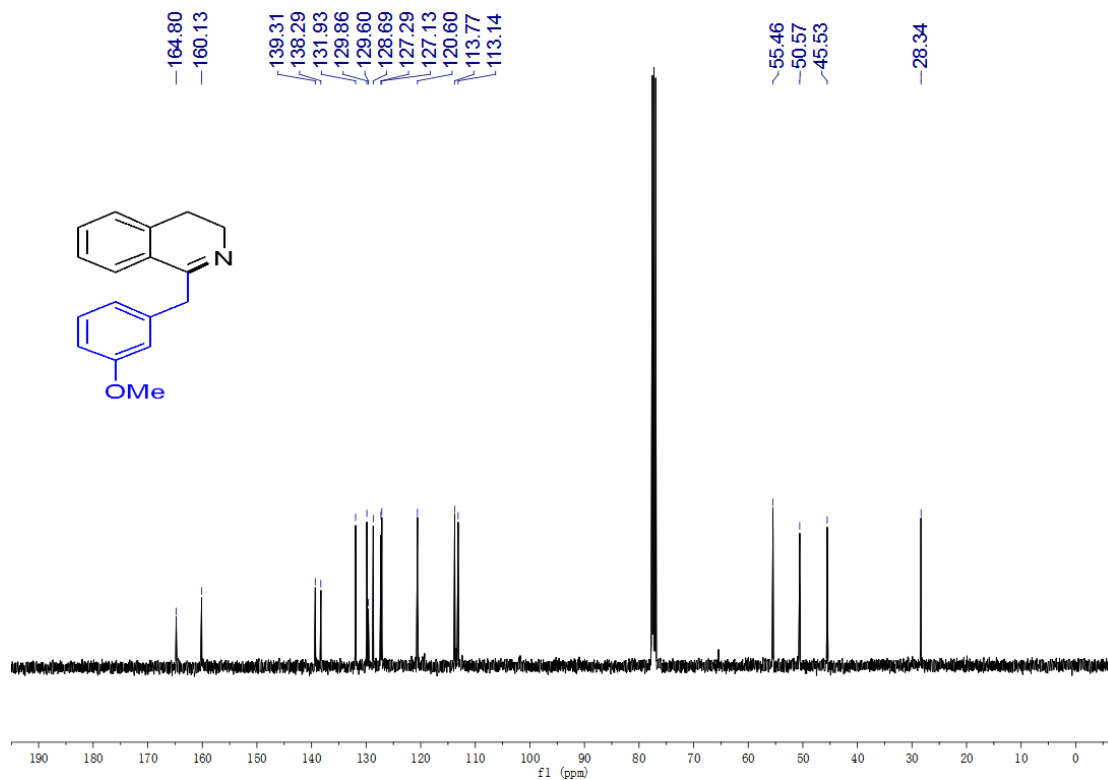

### <sup>1</sup>H NMR of product 3k in CDCl<sub>3</sub> (400 MHz)

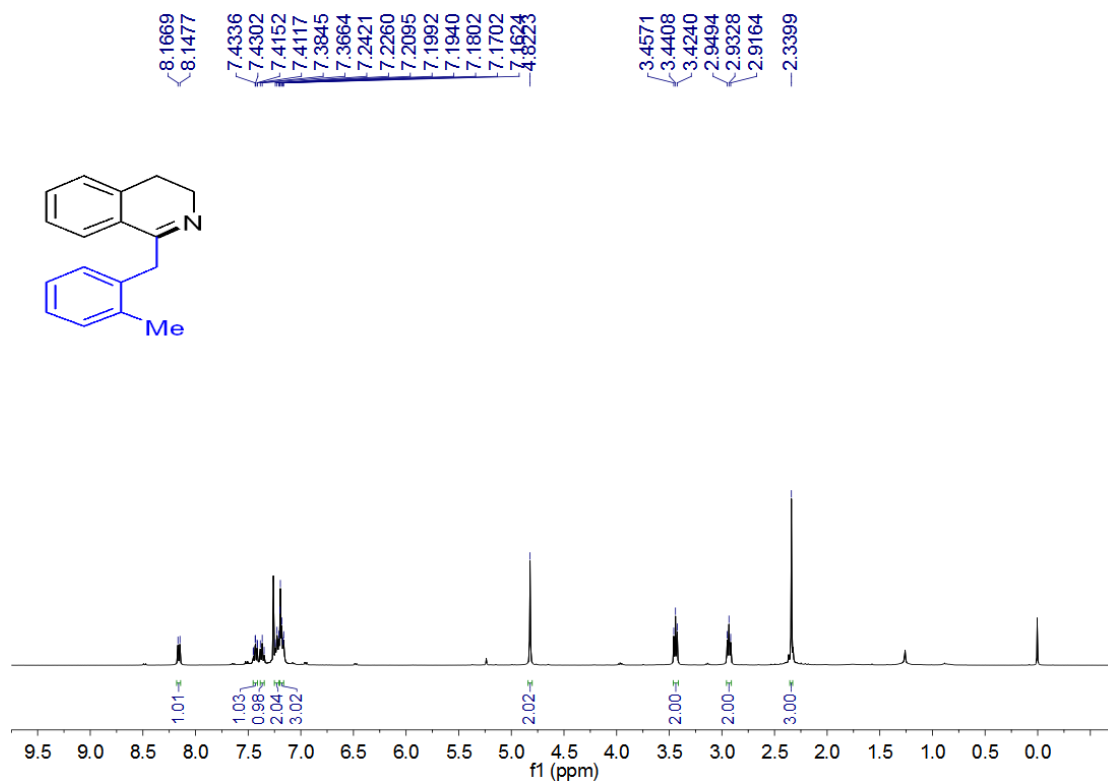

### <sup>13</sup>C NMR of product 3k in CDCl<sub>3</sub> (100 MHz)

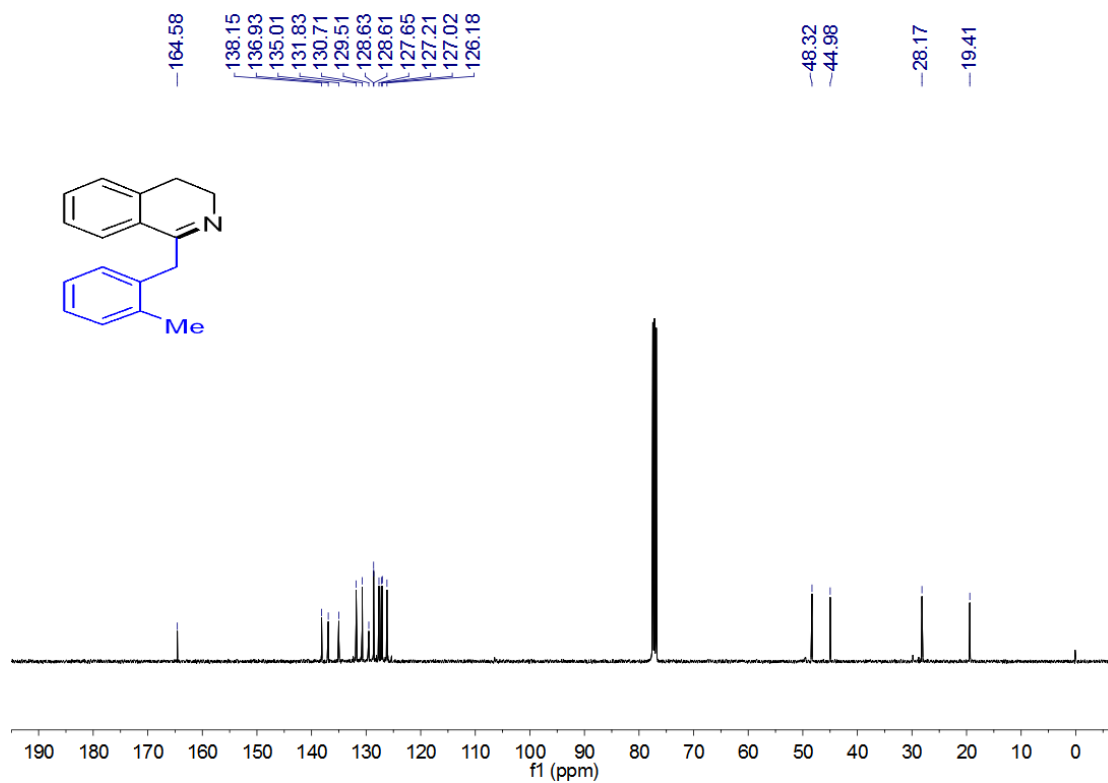

### <sup>1</sup>H NMR of product 3l in CDCl<sub>3</sub> (400 MHz)

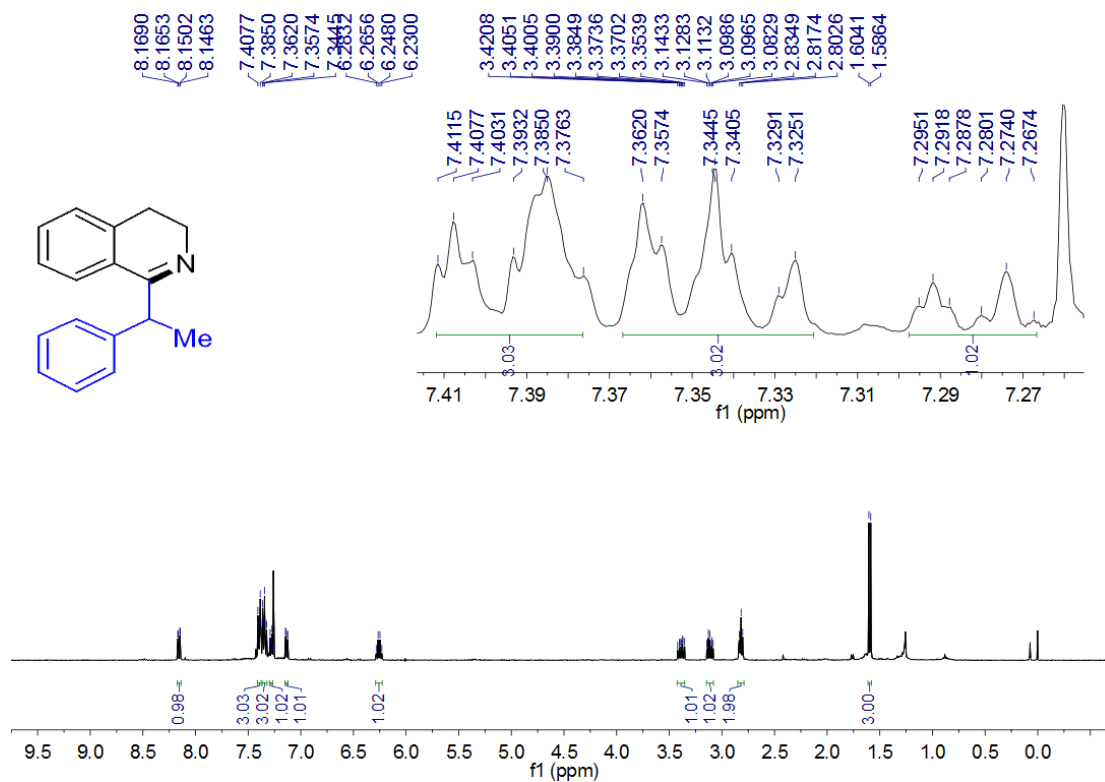

### <sup>13</sup>C NMR of product 3l in CDCl<sub>3</sub> (100 MHz)

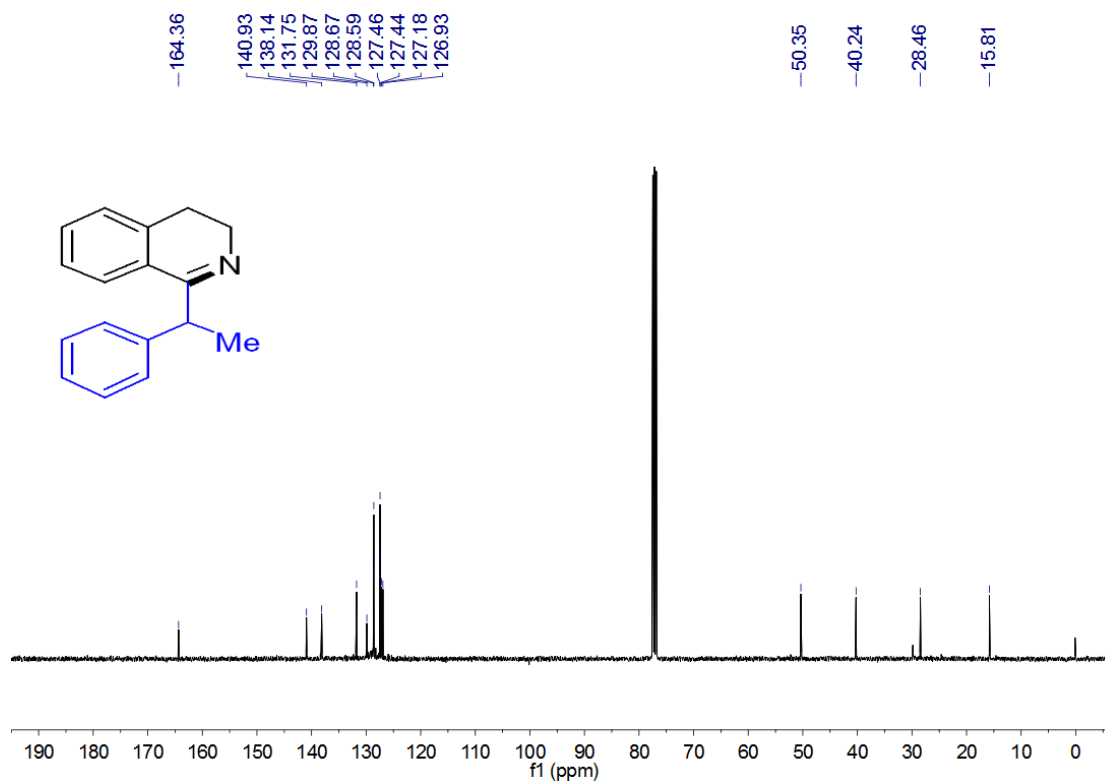

### $^1\text{H}$ NMR of product 3m in $\text{CDCl}_3$ (400 MHz)

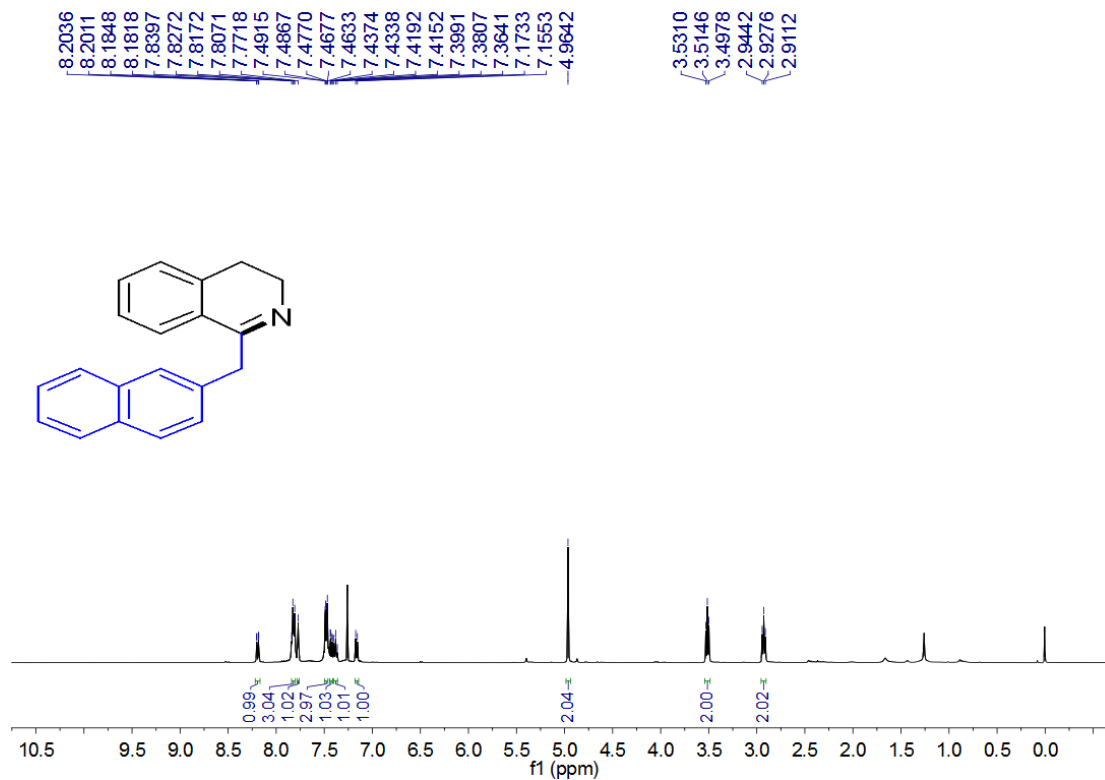

### $^{13}\text{C}$ NMR of product 3m in $\text{CDCl}_3$ (100 MHz)

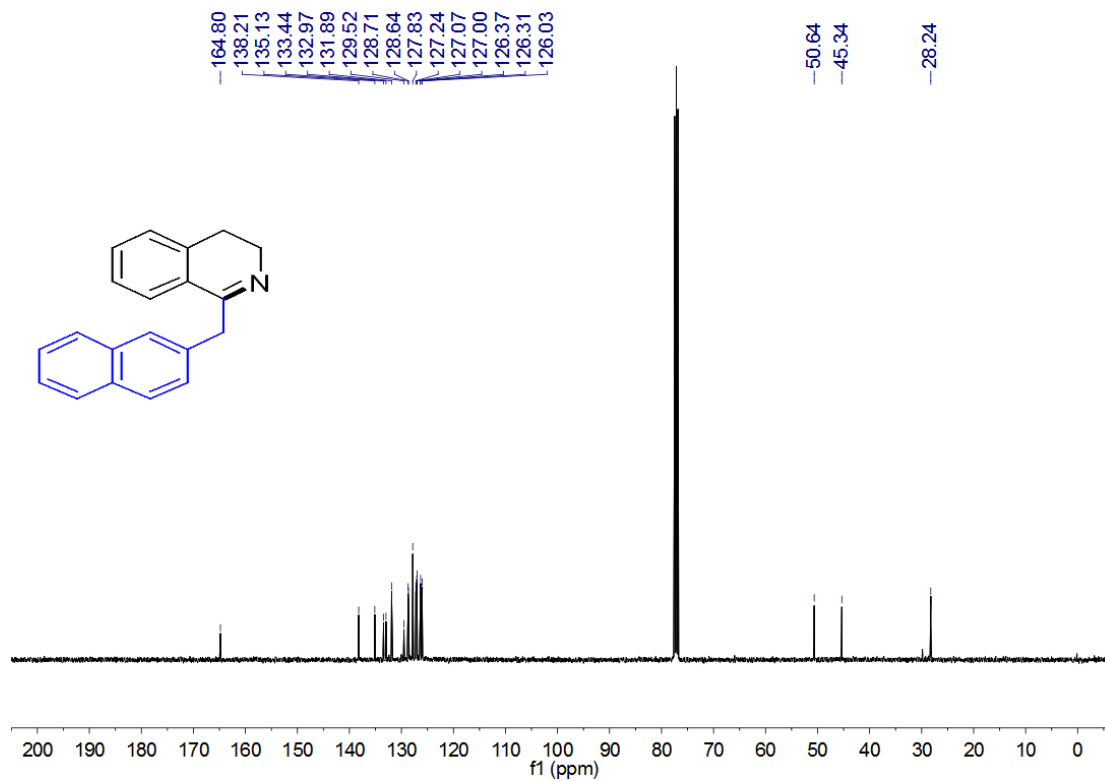

### $^1\text{H}$ NMR of product 3n in $\text{CDCl}_3$ (400 MHz)

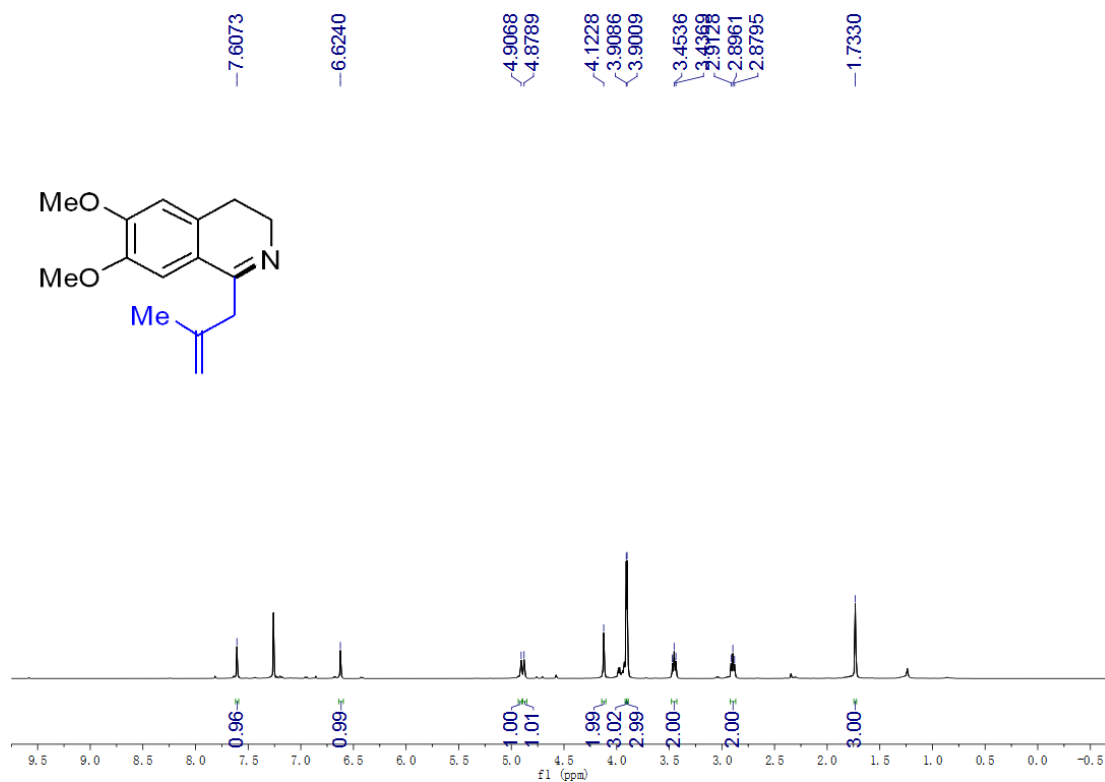

### $^{13}\text{C}$ NMR of product 3n in $\text{CDCl}_3$ (100 MHz)

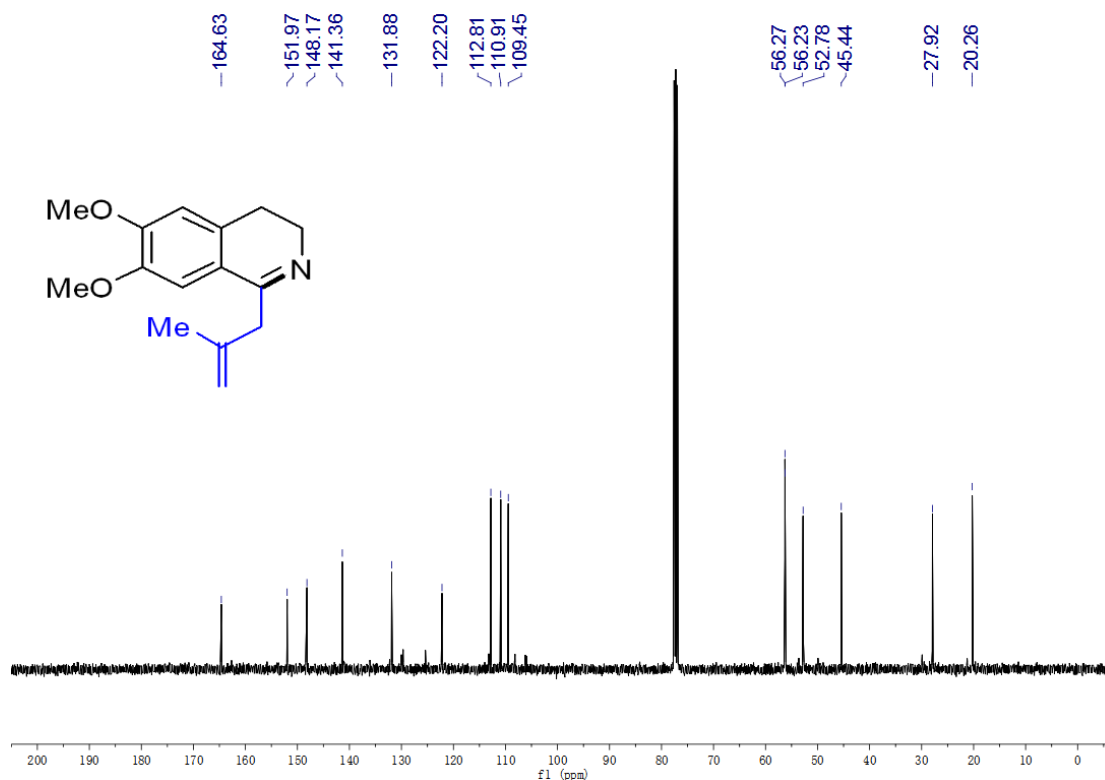



### $^1\text{H}$ NMR of product 3o in $\text{CDCl}_3$ (600 MHz)

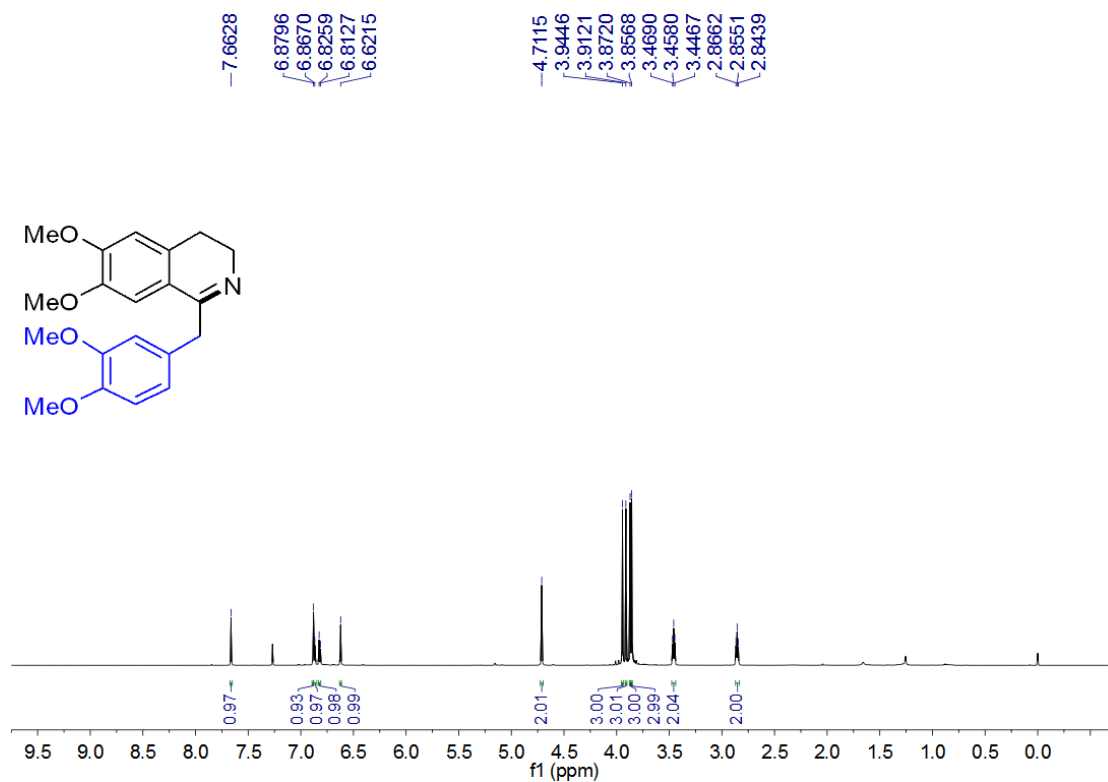

### $^{13}\text{C}$ NMR of product 3o in $\text{CDCl}_3$ (150 MHz)

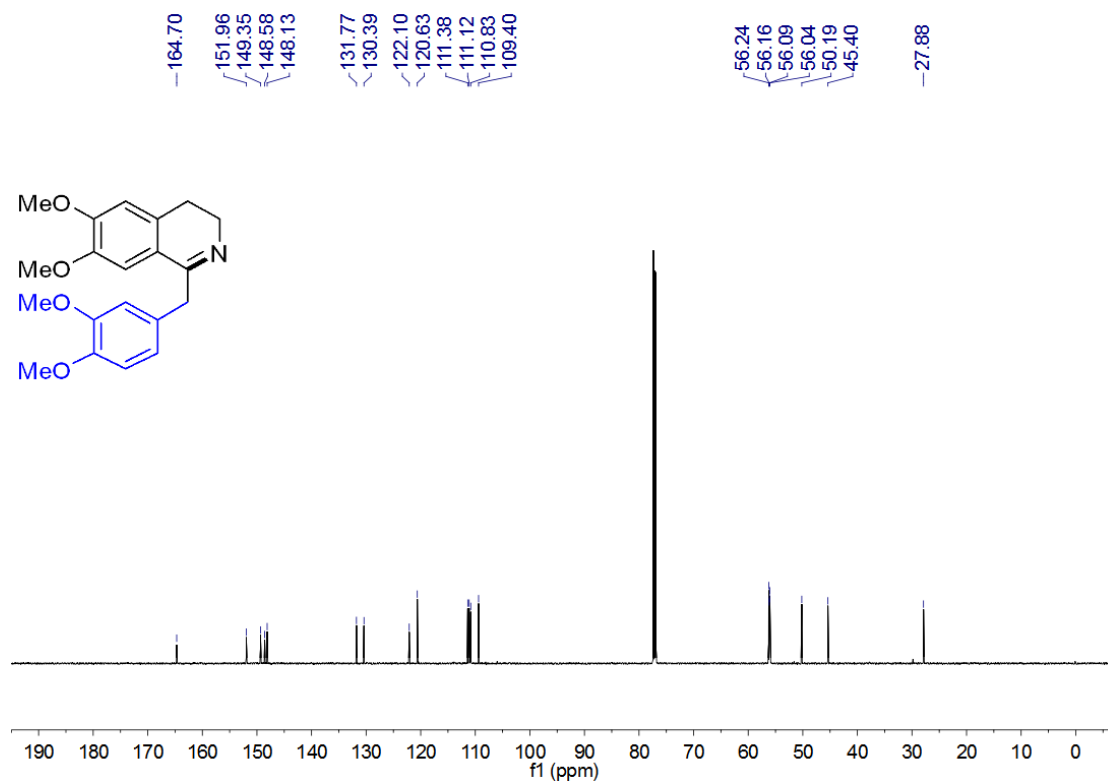

### $^1\text{H}$ NMR of product 3p in $\text{CDCl}_3$ (400 MHz)

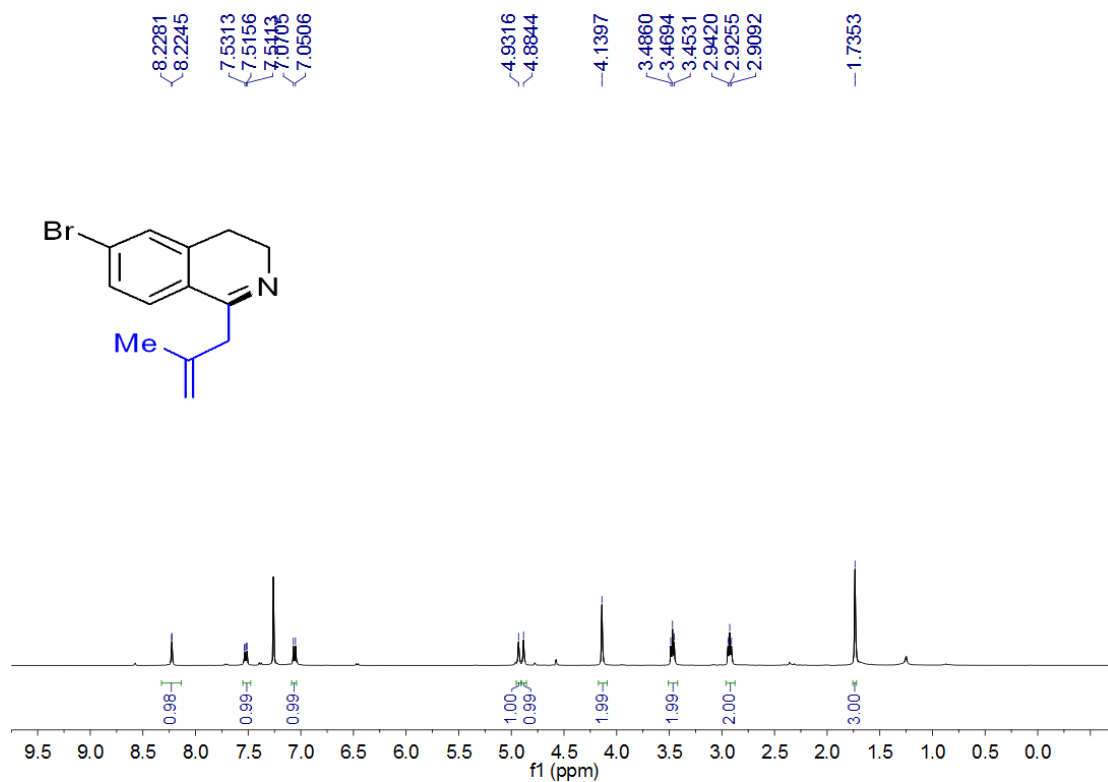

### $^{13}\text{C}$ NMR of product 3p in $\text{CDCl}_3$ (100 MHz)

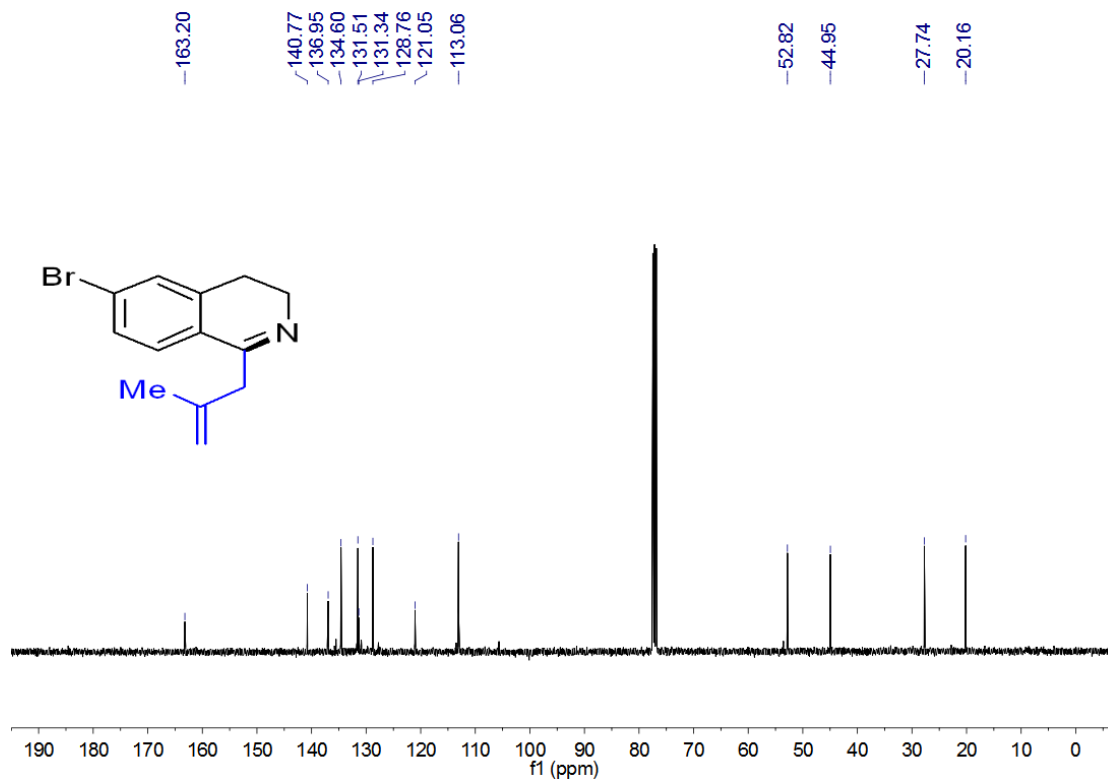

### $^1\text{H}$ NMR of product 3q in $\text{CDCl}_3$ (400 MHz)

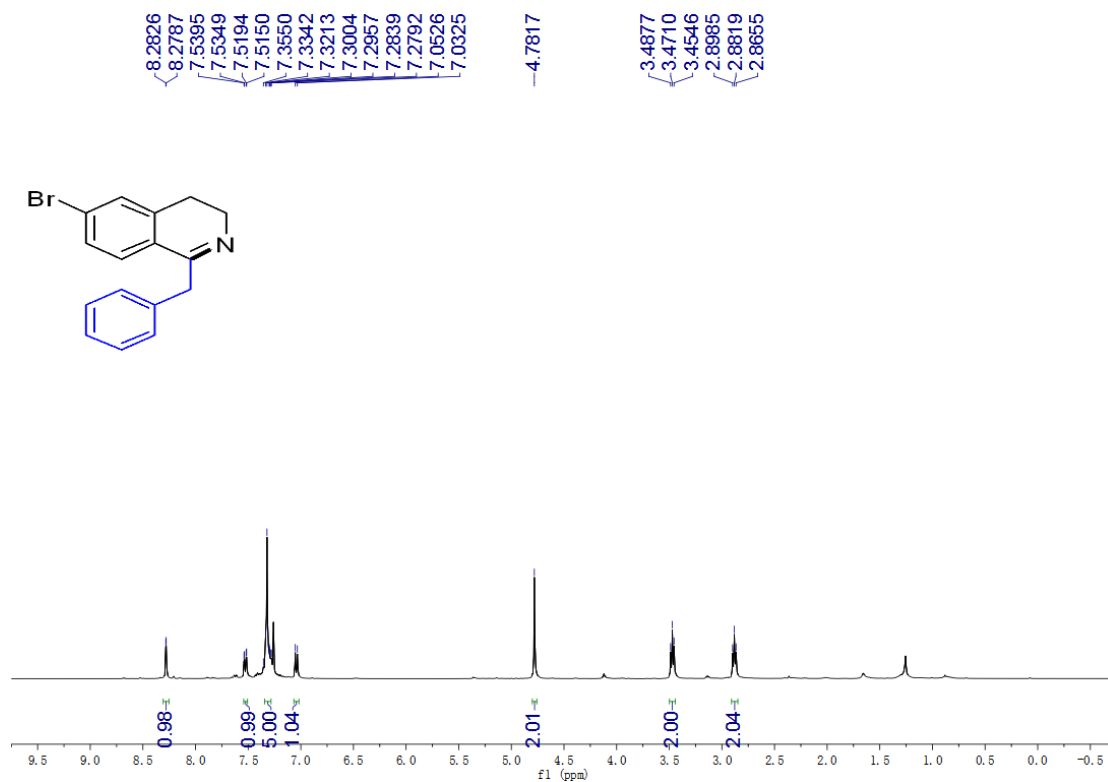

### $^{13}\text{C}$ NMR of product 3q in $\text{CDCl}_3$ (100 MHz)

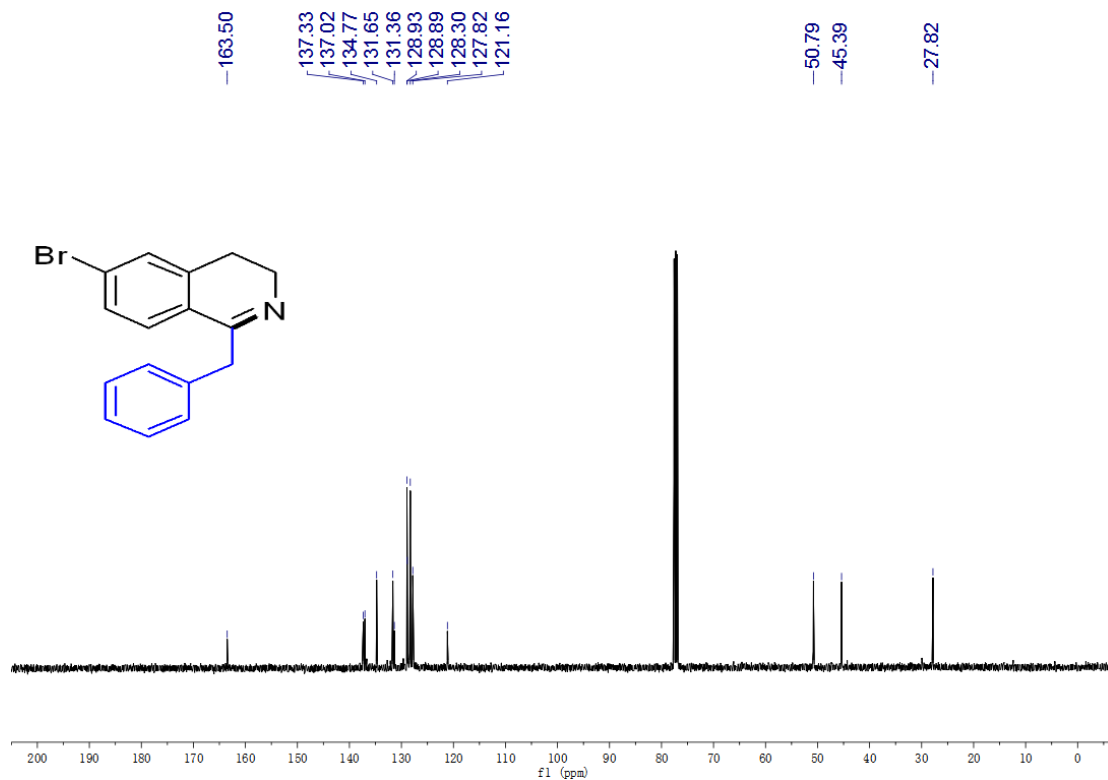

### $^1\text{H}$ NMR of product 3r in $\text{CDCl}_3$ (400 MHz)

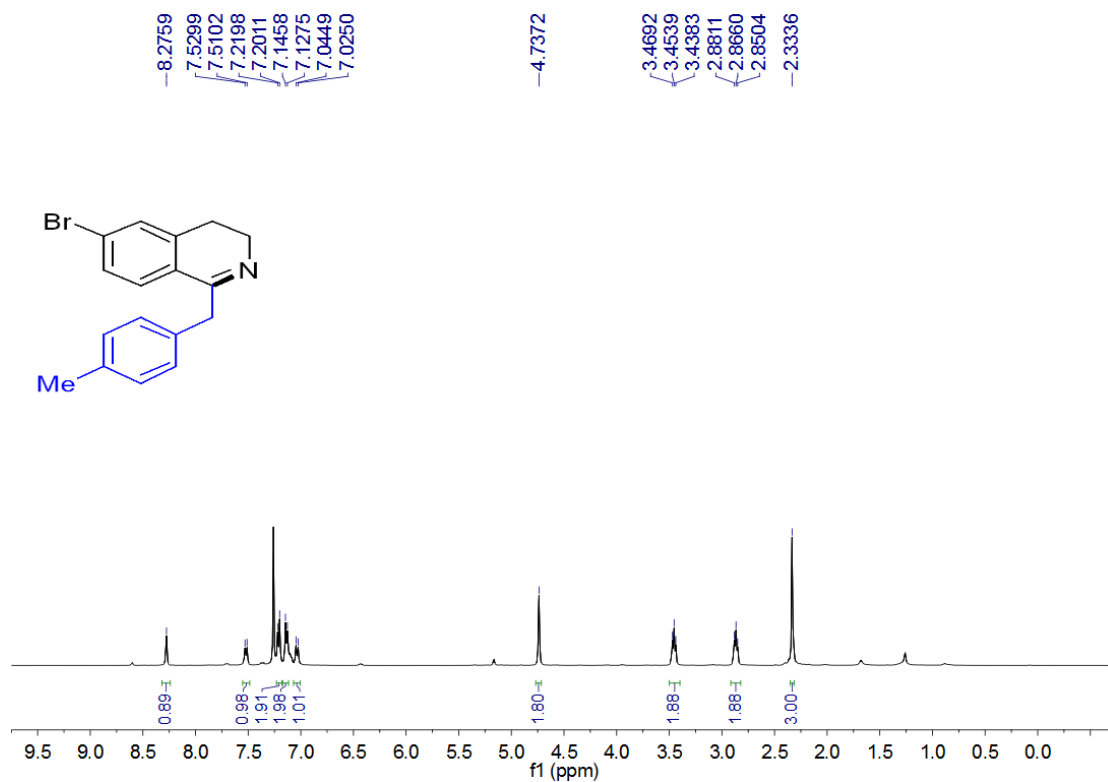

### $^{13}\text{C}$ NMR of product 3r in $\text{CDCl}_3$ (100 MHz)

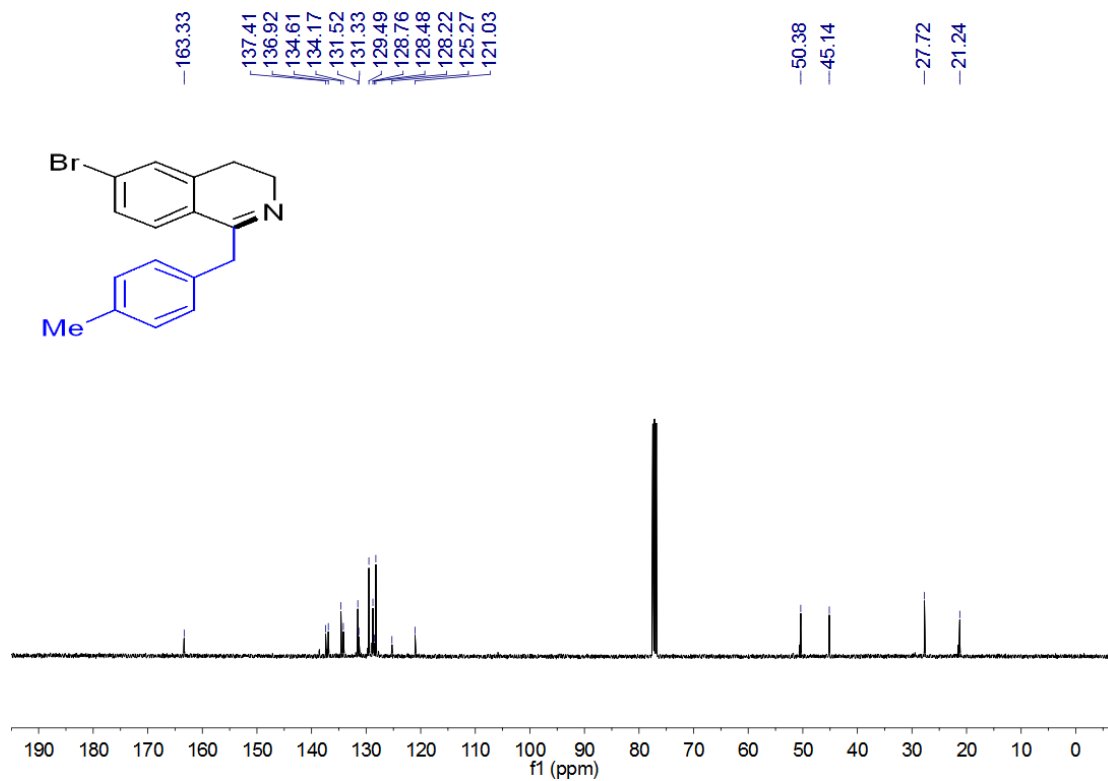

### $^1\text{H}$ NMR of product 3s in $\text{CDCl}_3$ (400 MHz)

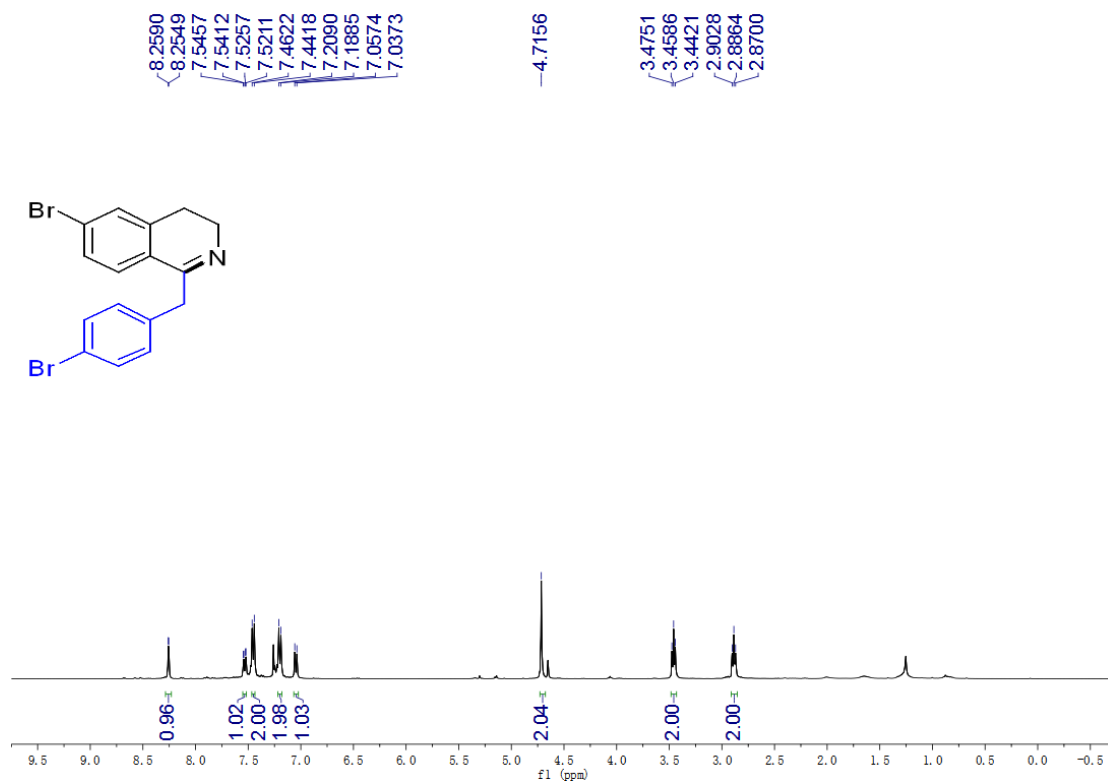

### $^{13}\text{C}$ NMR of product 3s in $\text{CDCl}_3$ (100 MHz)

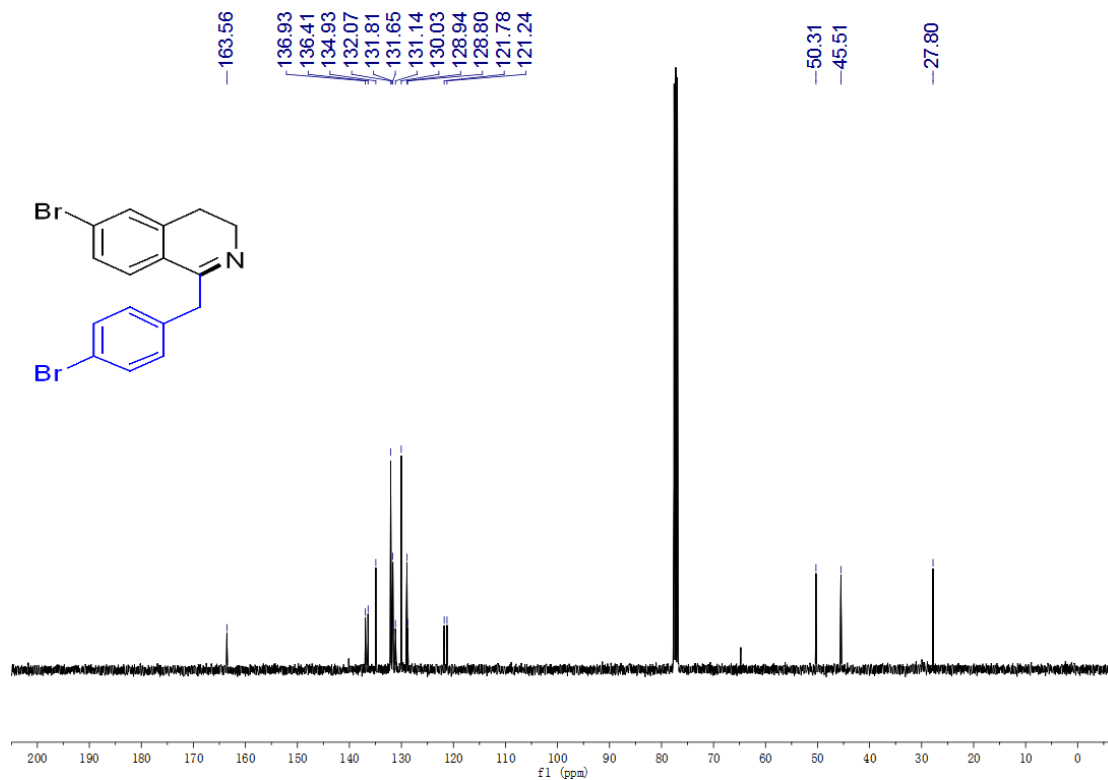

### $^1\text{H}$ NMR of product 3t in $\text{CDCl}_3$ (400 MHz)

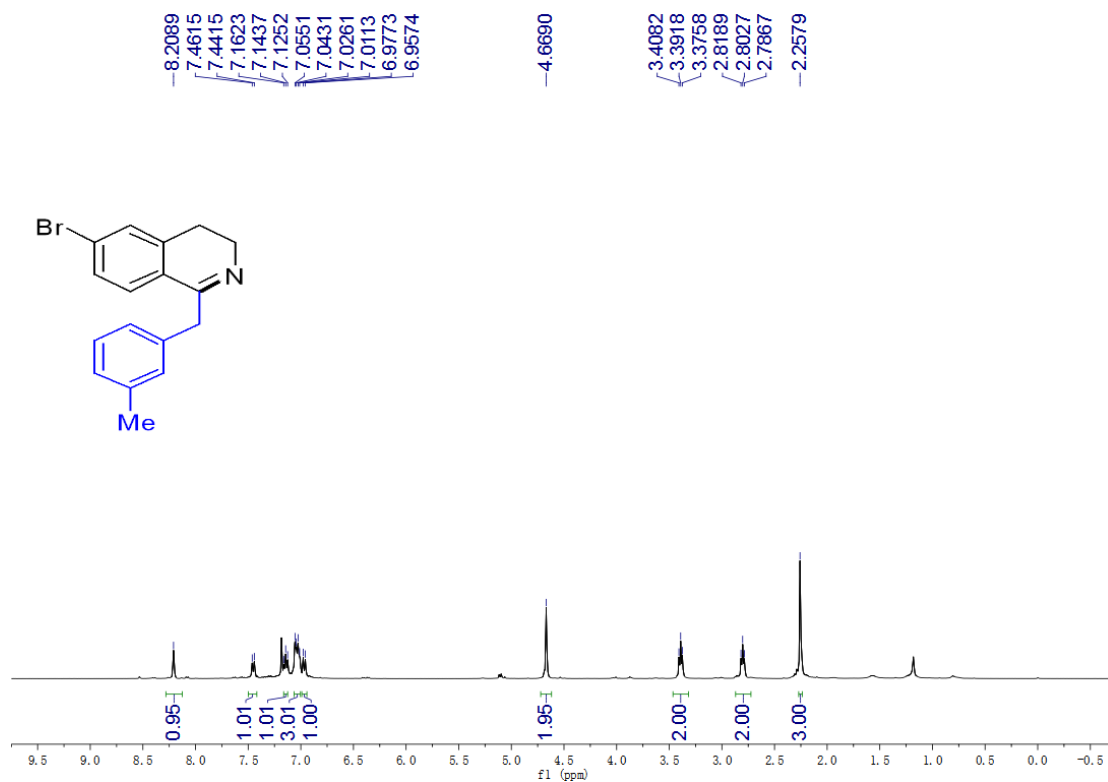

### $^{13}\text{C}$ NMR of product 3t in $\text{CDCl}_3$ (100 MHz)

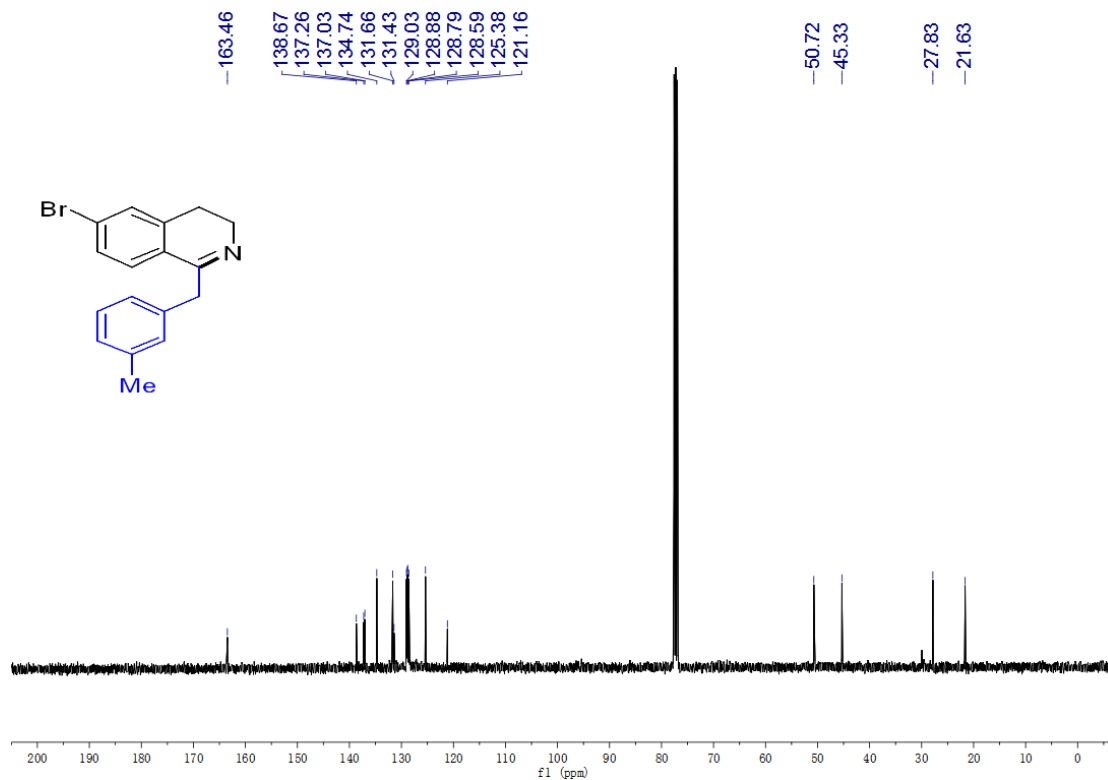

### <sup>1</sup>H NMR of product 3u in CDCl<sub>3</sub> (400 MHz)

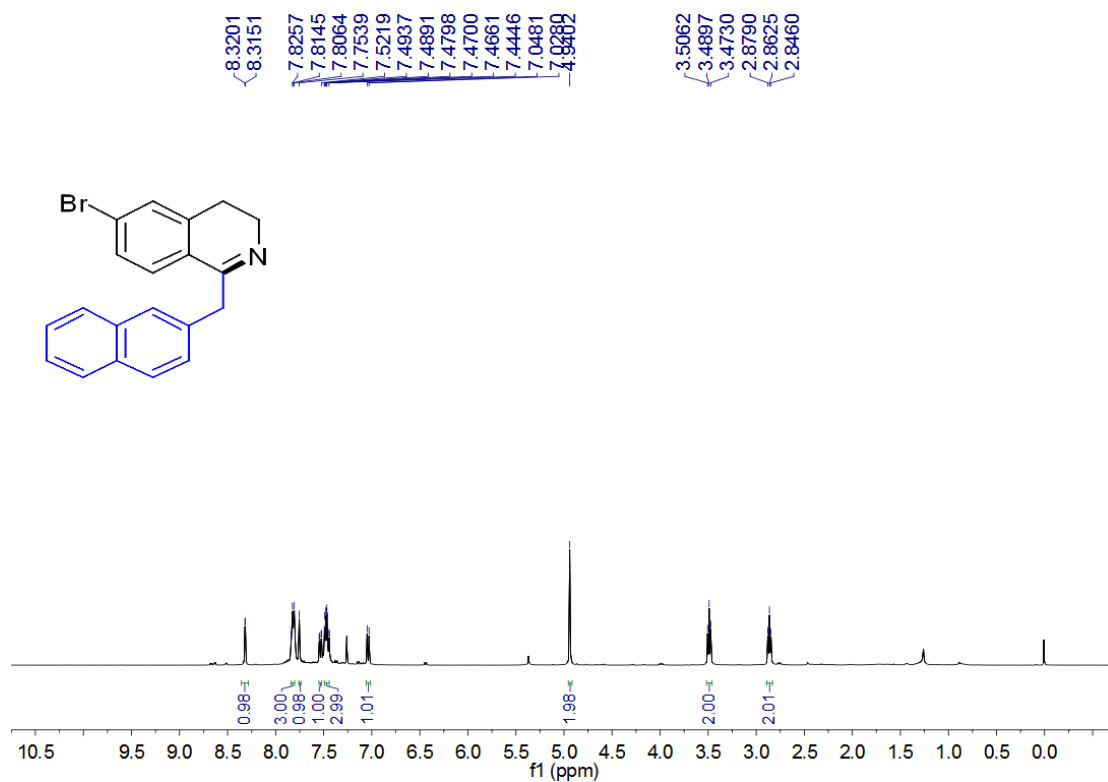

### <sup>13</sup>C NMR of product 3u in CDCl<sub>3</sub> (100 MHz)

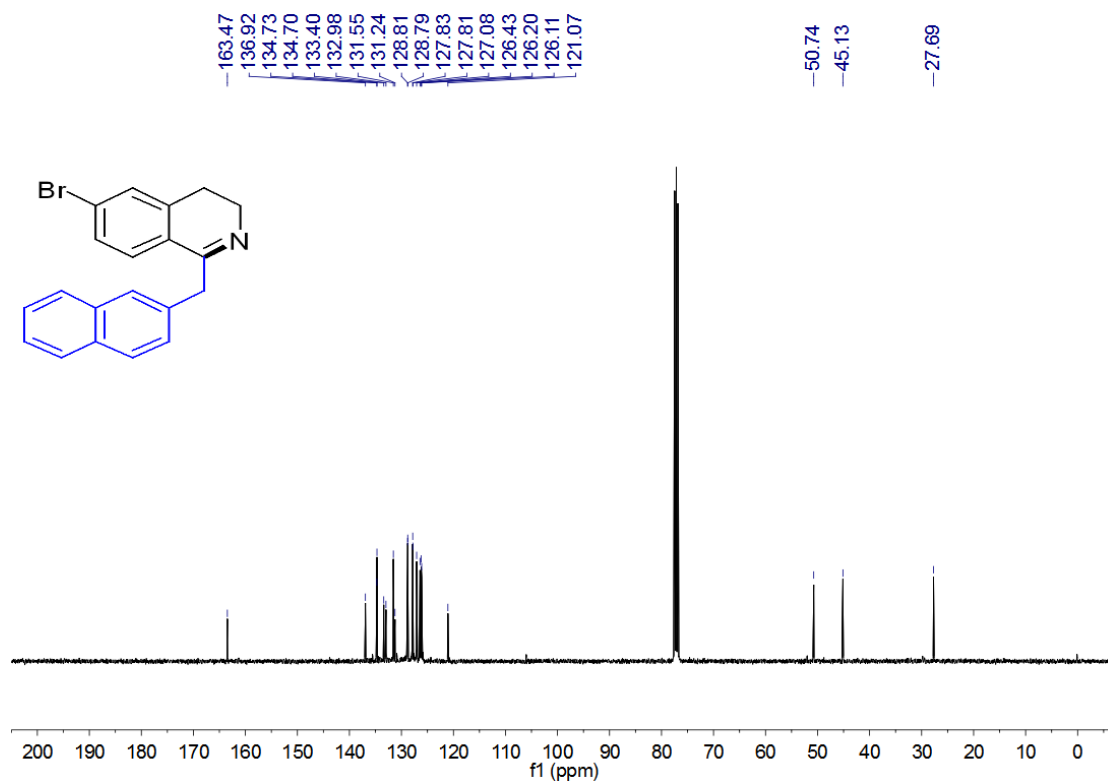

Supplement: d3qo02022c1.pdf [file d3qo02022c1.pdf]
